# Supplementary material for: Local-scale determinants of arboreal spider beta diversity in a temperate forest: roles of tree architecture, spatial distance, and dispersal capacity
Source: PeerJ. 2018 Sep 18;6:e5596. doi: 10.7717/peerj.5596 (PMC6149511; doi:10.7717/peerj.5596)
Supplement: Data S1 [file peerj-06-5596-s003.xlsx]

## Sheet: spider abd
	0506A1	0506A2	0506A3	0506A4	0506A5	0506A6	0506B1	0506B2	0506B3	0506B4	0506B5	0506B6	0506C1	0506C2	0506C3	0506C4	0506C5	0506C6	0508A2	0508A3	0508A4	0508A5	0508A6	0508B1	0508B2	0508B3	0508B4	0508B5	0508B6	0508C1	0508C2	0508C3	0508C4	0508C5	0508C6	0510A1	0510A2	0510A3	0510A4	0510A5	0510A6	0510B1	0510B2	0510B3	0510B4	0510B5	0510B6	0510C1	0510C2
Agyneta rurestris	0	0	0	0	0	0	0	0	0	0	0	0	0	0	0	0	0	0	0	0	0	0	1	0	1	0	2	0	1	0	0	0	0	0	0	0	0	0	0	0	0	0	0	0	0	1	0	0	0
Amaurobius fenestralis	0	0	0	0	0	0	0	0	0	0	0	0	0	0	0	0	0	0	0	0	0	0	0	0	0	0	0	0	0	0	0	0	0	0	0	0	0	0	0	0	0	0	0	0	0	0	0	0	0
Anelosimus vittatus	0	0	0	0	0	0	0	0	0	0	0	0	0	0	0	0	0	0	0	0	0	0	0	0	0	0	0	0	0	0	0	0	0	0	0	0	0	0	0	0	0	0	0	0	0	0	0	0	0
Anyphaena accentuata	0	0	0	0	0	0	0	0	0	31	4	21	15	18	12	16	24	22	0	0	0	0	0	12	30	18	11	12	7	14	11	7	10	28	22	0	0	0	0	1	0	2	1	0	3	3	1	3	5
Araeoncus humilis	0	0	0	0	0	0	0	0	0	0	0	0	0	0	0	0	0	0	0	0	0	0	0	0	0	0	0	0	0	0	0	0	0	0	0	0	0	0	0	0	0	0	0	0	0	0	0	0	0
Araneus diadematus	0	0	0	0	0	0	0	0	0	0	0	0	0	0	0	0	0	0	0	1	1	0	0	0	0	0	0	0	0	0	0	0	0	0	0	0	0	0	0	0	0	0	0	0	0	0	0	0	0
Araneus sturmi	0	0	0	0	0	0	0	0	0	0	0	0	0	0	0	0	0	0	0	0	0	0	0	0	0	0	0	0	0	0	0	0	0	0	0	2	0	0	1	1	0	1	0	0	0	0	1	2	2
Araneus triguttatus	0	0	0	0	0	0	0	0	0	0	0	0	0	0	0	0	0	0	0	0	0	0	0	0	0	0	0	0	0	0	0	0	0	0	0	0	0	0	0	0	0	0	0	0	0	0	0	0	0
Araniella cucurbitina	0	0	0	0	0	0	0	0	0	0	0	0	0	1	1	0	0	0	0	0	0	0	0	0	0	0	0	0	0	0	0	0	0	0	0	0	0	0	0	0	0	0	0	0	0	0	0	0	0
Araniella opisthographa	0	0	0	0	0	0	0	0	0	0	0	0	0	0	0	0	0	0	0	0	0	0	0	0	0	0	0	0	0	0	0	0	0	0	0	0	0	0	0	0	0	0	0	0	0	0	0	0	0
Ballus chalybeius	0	0	0	1	0	0	0	0	0	0	0	0	0	0	0	0	0	0	0	0	0	0	0	0	0	0	0	0	0	0	0	0	0	0	0	0	0	4	0	7	2	0	0	0	0	0	0	0	1
Bathyphantes gracilis	0	0	0	0	0	0	0	0	0	0	0	0	0	0	0	0	0	0	0	0	0	0	0	0	0	0	0	0	1	0	0	0	0	0	0	0	0	0	0	0	0	0	0	0	0	0	0	0	0
Centromerus sylvaticus	0	0	0	0	0	0	0	0	0	0	0	0	0	0	0	0	0	0	0	0	0	0	0	0	0	0	0	0	0	0	0	0	0	0	0	0	0	0	0	0	0	0	0	0	0	0	0	0	0
Clubiona caerulescens	0	0	0	0	0	0	0	0	0	0	0	0	0	0	0	0	0	0	0	0	0	0	0	0	0	0	0	0	0	0	0	0	0	0	0	0	0	0	0	0	0	0	0	0	0	0	0	0	0
Clubiona comta	0	0	0	0	0	0	0	0	0	0	0	0	0	0	0	0	0	0	0	0	0	0	0	0	0	0	1	0	0	0	0	0	0	0	0	0	0	0	0	0	0	0	0	0	0	2	1	0	0
Clubiona terrestris	0	0	0	0	0	0	0	0	0	0	0	0	0	0	0	0	0	0	0	0	0	0	0	0	0	0	0	0	0	0	0	0	0	0	0	1	0	0	0	0	1	0	0	0	0	0	0	0	0
Coelotes terrestris	0	0	0	0	0	0	0	0	0	0	0	0	0	0	0	0	0	0	0	0	0	0	0	0	0	0	0	0	0	0	0	0	0	0	0	0	0	0	0	0	0	0	0	0	0	0	0	0	0
Collinsia inerrans	0	0	0	0	0	0	0	0	0	0	0	0	0	0	0	0	0	0	0	0	0	0	0	0	0	0	0	0	0	0	0	0	0	0	0	0	0	0	0	0	0	0	0	0	0	0	0	0	0
Cyclosa conica	0	0	0	0	0	0	0	0	0	0	0	0	0	0	0	0	0	0	0	0	0	0	0	0	0	0	0	0	0	0	0	0	0	0	0	0	0	6	2	5	2	3	1	8	0	4	7	2	2
Diaea dorsata	0	0	0	0	0	0	0	0	0	0	0	0	0	0	0	0	0	0	0	0	0	0	0	0	0	0	0	0	0	0	0	0	0	0	0	0	0	1	0	0	0	0	0	0	0	0	1	1	0
Dicymbium nigrum	0	0	0	0	0	0	0	0	0	0	0	0	0	0	0	0	0	0	0	0	0	0	0	0	0	0	0	0	0	0	0	0	0	0	0	0	0	0	0	0	0	0	0	0	0	0	0	0	0
Diplocephalus picinus	0	0	0	0	2	0	0	0	0	0	0	0	0	0	0	0	0	0	0	0	0	0	0	0	0	0	0	0	0	0	0	0	0	0	0	0	0	0	0	0	0	0	0	0	0	0	0	0	0
Dipoena melanogaster	0	0	0	0	0	0	0	0	0	0	0	0	0	0	0	0	0	0	0	0	0	0	0	0	0	0	0	0	0	0	0	0	0	0	0	0	0	0	0	0	0	0	0	0	0	0	0	1	1
Drapetisca socialis	0	0	0	0	0	0	0	0	0	0	0	0	0	1	0	0	0	2	0	0	0	0	0	1	0	0	0	0	0	0	0	0	1	0	0	1	2	1	2	0	0	0	1	0	0	0	0	0	0
Enoplognatha ovata	0	0	0	0	0	0	0	1	0	0	2	0	1	0	0	1	1	5	0	0	0	0	0	2	2	0	0	0	1	0	0	0	1	2	1	0	0	0	0	0	0	0	0	0	0	0	0	0	0
Entelecara acuminata	0	0	0	0	0	0	0	0	0	0	0	0	0	2	0	0	1	0	0	0	0	0	0	0	0	0	0	0	0	0	0	0	0	0	0	0	0	0	0	0	0	0	0	0	0	0	0	0	0
Entelecara erythropus	0	0	0	0	0	0	0	0	0	0	0	0	0	0	0	0	0	0	0	0	0	0	0	0	0	0	0	0	0	0	0	0	0	0	0	0	0	0	0	0	0	0	0	0	0	0	0	0	0
Erigone atra	0	0	0	0	0	0	0	0	0	0	0	0	0	0	0	0	0	0	0	0	0	0	0	0	0	0	0	0	0	0	0	0	0	0	0	0	0	0	0	0	0	0	0	0	0	0	0	0	0
Erigone dentipalpis	0	0	0	0	0	0	0	0	0	0	0	0	0	0	0	0	0	0	0	0	0	0	0	0	0	0	0	0	0	0	0	0	0	0	0	0	0	0	0	0	0	0	0	0	0	0	0	0	0
Erigonella hiemalis	0	0	0	0	0	0	0	0	0	0	0	0	0	0	0	0	0	0	0	0	0	0	0	0	0	0	0	0	0	0	0	0	0	0	0	0	0	0	0	0	0	0	0	0	0	0	0	0	0
Evarcha falcata	0	0	0	0	0	0	0	0	0	0	0	0	0	0	0	0	0	0	0	0	0	0	0	0	0	0	0	0	0	0	0	0	0	0	0	0	0	0	0	0	0	0	0	0	0	0	0	0	0
Gibbaranea bituberculata	0	0	0	0	0	0	0	0	0	0	0	0	0	0	0	0	0	0	0	0	0	0	0	0	0	0	0	0	0	0	0	0	0	0	0	0	0	0	0	0	0	1	0	0	0	0	0	0	0
Gibbaranea gibbosa	0	0	0	0	0	0	0	0	0	0	0	0	0	0	0	0	0	0	0	0	0	0	0	0	0	0	0	0	0	0	0	0	0	0	0	0	0	0	0	0	0	0	0	0	0	0	0	0	0
Heliophanus cupreus	0	0	0	0	0	0	0	0	0	0	0	0	0	0	0	0	0	0	0	0	0	0	0	0	0	0	0	0	0	0	0	0	0	0	0	0	0	0	0	0	0	0	0	0	0	0	0	0	0
Hyptiotes paradoxus	0	0	0	0	0	0	0	1	0	1	1	1	0	0	0	0	1	0	0	0	0	0	0	0	3	4	2	2	2	0	0	0	0	0	0	0	0	0	0	0	0	2	1	0	3	1	1	0	0
Labulla thoracica	0	0	0	0	0	0	0	0	0	0	0	0	0	0	0	0	0	0	0	0	0	0	0	0	0	0	0	0	0	0	0	0	0	0	0	0	0	0	0	0	0	0	0	0	0	0	0	0	0
Lathys humilis	0	0	0	0	0	0	0	0	0	0	0	0	0	0	0	0	0	0	0	0	0	0	0	0	0	0	0	0	0	0	0	0	0	0	0	0	0	0	0	0	0	0	0	0	0	0	0	0	0
Lepthyphantes minutus	0	0	0	0	0	0	0	0	0	0	0	0	0	0	0	0	0	0	0	0	0	0	0	0	0	0	0	0	0	0	0	0	0	0	0	0	0	0	0	0	0	0	0	0	2	0	0	0	0
Linyphia hortensis	0	1	0	0	0	0	0	0	0	0	0	0	0	0	0	0	0	0	0	0	0	0	0	0	0	0	0	0	0	0	0	0	0	0	0	0	0	0	0	0	0	0	0	0	0	0	0	0	0
Linyphia triangularis	0	0	0	0	0	0	0	0	0	0	0	0	0	0	0	0	0	0	0	0	2	1	0	2	3	2	0	3	0	0	0	0	0	0	1	0	0	0	0	1	0	0	0	1	0	0	1	0	0
Mangora acalypha	0	0	0	0	0	0	0	0	0	0	0	0	0	0	0	0	0	0	0	0	0	0	0	0	0	0	0	0	0	0	0	0	0	0	0	5	4	2	0	6	6	0	1	0	2	3	4	2	1
Maso sundevalli	0	0	0	0	0	0	0	0	0	0	0	0	0	0	0	0	0	0	0	0	0	0	0	0	0	0	0	0	0	0	0	0	0	0	0	0	0	0	0	0	0	0	0	0	0	0	0	0	0
Mermessus trilobatus	0	0	0	0	0	0	0	0	0	0	0	0	0	0	0	0	0	0	0	1	0	0	0	0	0	0	0	0	0	0	0	0	0	0	0	0	0	0	0	0	0	0	0	0	0	0	0	0	0
Metellina mengei	0	0	0	0	0	0	0	0	0	0	0	0	0	0	0	0	0	0	0	0	0	0	0	0	0	0	0	0	0	0	0	0	0	0	0	10	3	17	2	0	7	27	34	42	45	32	50	3	5
Metellina segmentata	0	0	0	0	0	0	0	0	0	0	0	0	0	0	0	0	0	0	1	0	2	1	0	1	1	1	2	3	1	0	0	0	0	0	0	2	0	0	0	0	1	1	1	0	1	0	1	0	0
Micrommata virescens	0	0	0	0	0	0	0	0	0	0	0	0	0	0	0	0	0	0	0	0	0	0	0	0	0	0	0	0	0	0	0	0	0	0	0	0	0	0	0	1	0	0	0	0	0	0	0	0	0
Microneta viaria	0	0	0	0	0	0	0	0	0	0	0	0	0	0	0	0	0	0	0	0	0	0	0	0	1	0	0	0	0	0	0	0	0	0	0	0	0	0	0	0	0	0	0	0	0	0	0	0	0
Moebelia penicillata	0	0	0	0	0	0	0	0	0	0	0	0	0	0	0	0	0	0	0	0	0	0	0	0	0	0	0	0	0	0	0	0	0	0	0	0	0	0	0	0	0	0	0	0	0	0	0	0	0
Neottiura bimaculata	1	0	0	0	0	0	0	0	0	0	0	0	0	0	0	0	0	0	0	0	0	0	0	0	0	0	0	0	0	0	0	0	0	0	0	0	0	0	0	0	0	0	0	0	0	0	0	0	0
Neriene emphana	0	0	1	0	0	0	1	2	3	2	1	0	0	0	0	0	0	4	0	0	0	0	0	0	0	1	0	0	0	0	0	0	0	0	0	0	0	0	0	0	0	0	0	0	0	0	0	0	0
Neriene peltata	0	0	0	0	0	0	0	0	0	1	1	0	0	0	0	0	0	0	0	0	0	0	0	0	0	0	0	0	0	0	0	0	0	0	0	2	1	1	1	5	1	5	0	8	4	3	10	6	20
Nigma flavescens	0	0	0	0	0	0	0	0	0	0	0	0	0	0	0	0	0	0	0	0	0	0	0	0	0	0	0	0	0	0	0	0	0	0	0	0	0	0	0	0	0	0	0	0	0	0	0	0	0
Nusoncus nasutus	0	0	0	0	0	0	0	0	0	0	0	0	0	0	0	0	0	0	0	0	0	0	0	0	0	0	0	0	0	0	0	0	0	0	0	0	0	0	0	0	0	0	0	0	0	0	0	0	0
Obscuriphantes obscurus	0	0	0	0	0	0	0	0	0	0	0	0	0	0	0	0	0	0	0	0	0	0	0	0	0	0	0	0	0	0	0	0	0	0	0	0	0	0	0	0	0	0	0	0	0	0	0	0	0
Oedothorax apicatus	0	0	0	0	0	0	0	0	0	0	0	0	0	0	0	0	0	0	0	0	0	0	0	0	0	0	0	0	0	0	0	0	0	0	0	0	0	0	0	0	0	0	0	0	0	0	0	0	0
Oedothorax retusus	0	0	0	0	0	0	0	0	0	0	0	0	0	0	0	0	0	0	0	0	0	0	0	0	0	0	0	0	0	0	0	0	0	0	0	0	0	0	0	0	0	0	0	0	0	0	0	0	0
Pachygnatha degeeri	0	0	0	0	0	0	0	0	0	0	0	0	0	0	0	0	0	0	0	0	0	0	0	0	0	0	0	0	0	0	0	0	0	0	0	0	0	0	0	0	0	0	0	0	0	0	0	0	0
Paidiscura pallens	0	0	0	0	0	1	4	1	2	2	1	7	0	0	0	0	0	0	0	0	0	0	0	5	2	4	2	1	6	0	0	0	0	1	0	0	0	0	0	1	0	0	0	0	0	0	0	0	0
Parasteatoda lunata	0	0	0	0	0	0	0	0	0	0	0	0	0	0	0	0	0	0	0	0	0	0	0	0	1	0	0	0	0	0	0	0	0	0	0	0	0	0	0	0	0	0	0	0	0	0	0	0	0
Parasteatoda simulans	0	0	0	0	0	0	1	0	0	1	0	0	0	0	0	0	0	0	0	0	0	0	0	0	0	0	0	0	0	0	0	0	0	0	0	0	0	0	0	0	0	0	0	0	1	0	0	0	0
Pardosa lugubris	0	0	0	0	0	0	0	0	0	0	0	0	0	0	0	0	0	0	1	0	0	0	0	0	0	0	0	0	0	0	0	0	0	0	0	0	0	0	0	0	0	0	0	0	0	0	0	0	0
Pardosa saltans	0	1	0	0	0	0	0	0	0	0	0	0	0	0	0	0	0	0	0	0	0	0	0	0	0	0	0	0	0	0	0	0	0	0	0	0	0	0	0	0	0	0	0	0	0	0	0	0	0
Philodromus albidus	0	0	0	0	0	0	0	0	0	0	0	0	0	0	0	0	0	0	0	0	0	0	0	0	0	0	0	0	0	0	0	0	0	0	0	0	0	0	0	0	0	0	0	0	0	0	0	0	0
Philodromus aureolus	1	0	0	0	0	0	0	0	0	0	0	0	0	0	0	0	0	0	0	0	0	0	0	1	0	0	0	0	1	0	0	0	0	0	0	0	0	0	0	0	0	0	0	0	0	0	0	0	0
Philodromus collinus	0	0	0	0	0	0	0	0	0	0	0	1	0	0	0	0	0	0	0	0	0	0	0	0	0	0	0	0	0	0	0	0	0	0	0	0	0	0	0	0	0	0	0	0	0	0	0	0	0
Pisaura mirabilis	0	0	0	0	0	0	0	0	0	0	0	0	0	0	0	0	0	0	0	0	0	0	0	0	0	0	0	0	0	0	0	0	0	0	0	1	0	0	0	0	0	0	0	0	0	0	0	0	0
Platnickina tincta	1	0	0	0	1	0	0	2	0	0	0	1	0	0	0	0	0	1	0	0	0	0	0	0	1	0	3	2	0	0	0	0	0	0	0	1	0	0	1	0	0	1	1	1	3	1	2	0	1
Porrhomma microphthalmum	0	0	0	0	0	0	0	0	0	0	0	0	0	0	0	0	0	0	0	0	0	1	0	0	0	0	0	0	0	0	0	0	0	0	0	0	0	0	0	0	0	0	0	0	0	0	0	0	0
Porrhomma oblitum	0	0	0	0	0	0	0	0	0	0	0	0	0	0	0	0	0	0	0	0	0	0	0	0	0	0	0	0	0	0	0	0	0	0	0	0	0	0	0	0	0	0	0	0	0	0	0	0	0
Porrhomma pygmaeum	0	0	0	0	0	0	0	0	0	0	0	0	0	0	0	0	0	0	0	0	0	0	0	0	0	0	0	0	0	0	0	0	0	0	0	0	0	0	0	0	0	0	0	0	0	0	0	0	0
Robertus arundineti	0	0	0	0	0	0	0	0	0	0	0	0	0	0	0	0	0	0	0	0	0	0	0	0	0	0	0	0	0	0	0	0	0	0	0	0	0	0	0	0	0	0	0	0	0	0	0	0	0
Saaristoa firma	0	0	0	0	0	0	0	0	0	0	0	0	0	0	0	0	0	0	0	0	0	0	0	0	0	0	0	0	0	0	0	0	0	0	0	0	0	0	0	0	0	0	0	0	0	0	0	0	0
Sintula corniger	0	0	0	0	0	0	0	0	0	0	0	0	0	0	0	0	0	0	0	0	0	0	0	0	0	0	0	0	0	0	0	0	0	0	0	0	0	0	0	0	0	0	0	0	0	0	0	0	0
Synema globosum	0	0	0	0	0	0	0	0	0	0	0	0	0	0	0	0	0	0	0	0	0	0	0	0	0	0	0	0	0	0	0	0	0	0	0	0	0	0	0	0	0	0	0	0	0	0	0	0	0
Tenuiphantes alacris	0	0	0	0	0	0	1	0	0	0	0	0	0	0	0	0	0	0	0	0	0	0	0	0	0	0	0	0	0	0	0	0	0	0	0	0	0	0	0	0	0	0	0	0	0	0	0	0	0
Tenuiphantes flavipes	0	0	0	0	0	0	0	0	0	0	0	0	0	0	0	0	0	0	0	0	0	0	0	0	1	0	0	1	0	0	0	0	0	0	0	0	0	0	0	0	0	0	0	0	0	0	0	0	0
Tenuiphantes tenebricola	0	0	0	0	0	0	0	0	0	0	0	0	0	0	0	0	0	0	0	0	0	0	0	0	0	0	0	0	0	0	0	0	0	0	0	0	0	0	0	0	0	0	0	0	0	0	0	0	0
Tenuiphantes tenuis	0	0	0	0	0	0	0	0	0	0	0	0	0	0	0	0	0	0	0	0	0	0	0	0	1	0	0	0	0	0	0	0	0	0	0	0	0	0	0	0	0	0	0	0	0	0	0	0	0
Tetragnatha montana	0	0	0	0	0	0	0	0	0	0	0	0	0	0	0	0	0	0	0	0	0	0	0	0	0	0	0	0	0	0	0	0	0	0	0	0	0	0	0	0	0	0	0	0	0	0	0	0	0
Tetragnatha obtusa	0	1	0	0	0	0	0	1	0	0	0	3	0	0	0	0	0	0	0	0	0	0	0	0	1	0	0	0	0	0	0	0	0	0	0	0	0	0	0	0	0	0	0	0	0	0	0	0	0
Tetragnatha pinicola	0	0	0	0	0	0	0	0	0	0	0	0	0	0	0	0	0	0	0	0	0	0	0	0	0	0	0	0	0	0	0	0	0	0	0	3	0	0	0	5	0	3	4	4	5	6	11	1	7
Theridion mystaceum	0	0	0	0	0	1	0	0	0	0	0	0	0	0	0	0	0	0	0	0	0	0	0	0	0	0	0	0	0	0	0	0	0	0	0	0	0	0	1	1	0	0	2	2	1	2	1	0	0
Theridion pinastri	0	0	0	0	0	0	0	0	0	0	0	0	0	0	0	0	0	0	0	1	0	0	0	0	0	0	0	0	0	0	0	0	0	0	0	0	0	0	0	0	0	0	0	0	0	0	0	0	0
Theridion varians	0	0	0	0	0	0	0	0	0	0	0	0	1	2	0	1	0	2	0	0	0	0	0	0	0	0	0	0	0	1	0	0	1	0	1	0	0	0	0	0	0	0	0	0	0	0	0	1	1
Thyreosthenius parasiticus	0	0	0	0	0	0	0	0	0	0	0	0	0	0	0	0	0	0	0	0	0	0	0	0	0	0	0	0	0	0	0	0	0	0	0	0	0	0	0	0	0	0	0	0	0	0	0	0	0
Xysticus cf. VS45	0	0	0	0	0	0	0	0	0	0	0	0	0	0	0	0	0	0	0	0	0	0	0	0	0	0	0	0	0	0	0	0	0	0	0	0	0	0	0	0	0	0	0	0	0	0	0	0	0
Xysticus lanio	0	0	0	0	0	0	0	0	0	0	0	0	0	0	0	0	0	0	0	0	0	0	0	0	0	0	0	0	0	0	0	0	0	0	0	0	0	0	0	0	0	0	0	0	0	0	0	0	0
Zilla diodia	0	0	0	0	0	0	0	0	0	0	0	0	0	0	0	0	0	0	0	0	0	0	0	0	0	0	0	0	0	0	0	0	0	0	0	0	0	0	0	0	0	0	0	0	0	0	0	0	0
[truncated: 240 more columns]

## Sheet: spider env
	Year	Month	Season	Tree.Age	DBH	Height	First.branch	E	W	S	N	Leaves.cover	volume	DS	PRCP	SNWD	PRCP2	SNWD2	TMAX2	TMIN2	MT2	L.DBH	L.E	L.volume
0506A1	2005	6	3	A	235	16	12	8.9	8.9	10.5	10.6	90	250.387	1	1.14	0	0.038	0	75.67	53.9	64.78	5.45959	2.18605	5.52301
0506A2	2005	6	3	A	179	12	10	8	5.4	5.3	9.6	98	66.5533	1	1.14	0	0.038	0	75.67	53.9	64.78	5.18739	2.07944	4.198
0506A3	2005	6	3	A	169	23	15	8	5.4	5.3	9.6	98	266.213	1	1.14	0	0.038	0	75.67	53.9	64.78	5.1299	2.07944	5.5843
0506A4	2005	6	3	A	210	16	8	7.5	10.3	8	9.8	100	422.453	1	1.14	0	0.038	0	75.67	53.9	64.78	5.34711	2.0149	6.04608
0506A5	2005	6	3	A	195	21	17	11.7	7.3	5.8	9.7	95	196.333	1	1.14	0	0.038	0	75.67	53.9	64.78	5.273	2.45959	5.27981
0506A6	2005	6	3	A	216	26	8	6.1	8.9	10	7.2	100	774	1	1.14	0	0.038	0	75.67	53.9	64.78	5.37528	1.80829	6.65157
0506B1	2005	6	3	B	70	15	12	3.8	5.8	1.7	4.4	85	29.28	2	1.14	0	0.038	0	75.67	53.9	64.78	4.2485	1.335	3.3769
0506B2	2005	6	3	B	88.5	20	13	3.9	6.2	6	6.2	95	143.757	2	1.14	0	0.038	0	75.67	53.9	64.78	4.483	1.36098	4.96812
0506B3	2005	6	3	B	77	20	11	3.3	3.2	5.3	2.2	95	73.125	2	1.14	0	0.038	0	75.67	53.9	64.78	4.34381	1.19392	4.29217
0506B4	2005	6	3	B	63	20	13	1.5	3.7	2.8	4.3	100	43.0733	2	1.14	0	0.038	0	75.67	53.9	64.78	4.14313	0.405465	3.7629
0506B5	2005	6	3	B	76	20	15	3.5	2.1	2.8	3	99	27.0667	2	1.14	0	0.038	0	75.67	53.9	64.78	4.33073	1.25276	3.2983
0506B6	2005	6	3	B	76	20	12	3.8	3.7	4.7	4	100	87	2	1.14	0	0.038	0	75.67	53.9	64.78	4.33073	1.335	4.46591
0506C1	2005	6	3	C	34	10	1	1	3	5	2	99	42	3	1.14	0	0.038	0	75.67	53.9	64.78	3.52636	0	3.73767
0506C2	2005	6	3	C	28	8	0.5	2	3	4	2	100	37.5	3	1.14	0	0.038	0	75.67	53.9	64.78	3.3322	0.693147	3.62434
0506C3	2005	6	3	C	25	8	2	3	2	4	1	100	25	3	1.14	0	0.038	0	75.67	53.9	64.78	3.21888	1.09861	3.21888
0506C4	2005	6	3	C	29	10	5	1	2	3	3	95	15	3	1.14	0	0.038	0	75.67	53.9	64.78	3.3673	0	2.70805
0506C5	2005	6	3	C	34	8	6	2	5	1	2	100	7	3	1.14	0	0.038	0	75.67	53.9	64.78	3.52636	0.693147	1.94591
0506C6	2005	6	3	C	28	8	7	1	2	3	2	100	2.5	3	1.14	0	0.038	0	75.67	53.9	64.78	3.3322	0	0.916291
0508A2	2005	8	4	A	205	26	12	7	2	4	7	95	231	1	1.91	0	0.0616	0	72.94	54.23	63.58	5.32301	1.94591	5.44242
0508A3	2005	8	4	A	207	25	8	5	5	6	6	100	340	1	1.91	0	0.0616	0	72.94	54.23	63.58	5.33272	1.60944	5.82895
0508A4	2005	8	4	A	210	25	10	5	5	4	3	99	175	1	1.91	0	0.0616	0	72.94	54.23	63.58	5.34711	1.60944	5.16479
0508A5	2005	8	4	A	176	25	12	5	4	5	5	98	195	1	1.91	0	0.0616	0	72.94	54.23	63.58	5.17048	1.60944	5.273
0508A6	2005	8	4	A	195	26	11	5	4	5	3	95	180	1	1.91	0	0.0616	0	72.94	54.23	63.58	5.273	1.60944	5.19296
0508B1	2005	8	4	B	62	15	7	3	2	3	2.5	99	36.6667	2	1.91	0	0.0616	0	72.94	54.23	63.58	4.12713	1.09861	3.60187
0508B2	2005	8	4	B	86	15	8	3	3.5	1.5	3	98	34.125	2	1.91	0	0.0616	0	72.94	54.23	63.58	4.45435	1.09861	3.53003
0508B3	2005	8	4	B	68	18	8	2	2.5	2	2	99	30	2	1.91	0	0.0616	0	72.94	54.23	63.58	4.21951	0.693147	3.4012
0508B4	2005	8	4	B	77	13	8	5	3	1	5	98	40	2	1.91	0	0.0616	0	72.94	54.23	63.58	4.34381	1.60944	3.68888
0508B5	2005	8	4	B	88	17	10	2	3	3	3	98	35	2	1.91	0	0.0616	0	72.94	54.23	63.58	4.47734	0.693147	3.55535
0508B6	2005	8	4	B	71	17	13	2	2	2	4	98	16	2	1.91	0	0.0616	0	72.94	54.23	63.58	4.26268	0.693147	2.77259
0508C1	2005	8	4	C	32	7	2	2	3	5	2	95	29.1667	3	1.91	0	0.0616	0	72.94	54.23	63.58	3.46574	0.693147	3.37303
0508C2	2005	8	4	C	35	8	3	2	3	4	2	96	25	3	1.91	0	0.0616	0	72.94	54.23	63.58	3.55535	0.693147	3.21888
0508C3	2005	8	4	C	25	9	3	3	2	4	1	100	25	3	1.91	0	0.0616	0	72.94	54.23	63.58	3.21888	1.09861	3.21888
0508C4	2005	8	4	C	29	6	1	1	2	3	3	95	15	3	1.91	0	0.0616	0	72.94	54.23	63.58	3.3673	0	2.70805
0508C5	2005	8	4	C	32	8	6	2	5	1	2	99	7	3	1.91	0	0.0616	0	72.94	54.23	63.58	3.46574	0.693147	1.94591
0508C6	2005	8	4	C	26	11	5	2	2	4	3	100	28	3	1.91	0	0.0616	0	72.94	54.23	63.58	3.2581	0.693147	3.3322
0510A1	2005	10	4	A	183	22	8	4	5	3	4	100	147	1	1.25	0	0.0403	0	61.1	45.13	53.11	5.20949	1.38629	4.99043
0510A2	2005	10	4	A	209	23	8	5	9	4	9	98	455	1	1.25	0	0.0403	0	61.1	45.13	53.11	5.34233	1.60944	6.1203
0510A3	2005	10	4	A	210	19	11	7	6	7	7	99	242.667	1	1.25	0	0.0403	0	61.1	45.13	53.11	5.34711	1.94591	5.49169
0510A4	2005	10	4	A	176	20	11	6	8	6	8	99	294	1	1.25	0	0.0403	0	61.1	45.13	53.11	5.17048	1.79176	5.68358
0510A5	2005	10	4	A	181	23	3	5	6	5	5	100	366.667	1	1.25	0	0.0403	0	61.1	45.13	53.11	5.1985	1.60944	5.90445
0510A6	2005	10	4	A	224	23	13	8	4	8	8	99	320	1	1.25	0	0.0403	0	61.1	45.13	53.11	5.41165	2.07944	5.76832
0510B1	2005	10	4	B	70	18	14	1.5	2.5	2.5	2.5	97	13.3333	2	1.25	0	0.0403	0	61.1	45.13	53.11	4.2485	0.405465	2.59027
0510B2	2005	10	4	B	69	16	13	2	2.5	1.5	3.5	95	11.25	2	1.25	0	0.0403	0	61.1	45.13	53.11	4.23411	0.693147	2.42037
0510B3	2005	10	4	B	69	14	7	3	3	4	2	98	42	2	1.25	0	0.0403	0	61.1	45.13	53.11	4.23411	1.09861	3.73767
0510B4	2005	10	4	B	92	15	8	3	5	2	4	99	56	2	1.25	0	0.0403	0	61.1	45.13	53.11	4.52179	1.09861	4.02535
0510B5	2005	10	4	B	69	18	13	2	3	2	4	99	25	2	1.25	0	0.0403	0	61.1	45.13	53.11	4.23411	0.693147	3.21888
0510B6	2005	10	4	B	80	19	14	4	3	4	4	100	46.6667	2	1.25	0	0.0403	0	61.1	45.13	53.11	4.38203	1.38629	3.84303
0510C1	2005	10	4	C	33	8	2	1	4	2	2	100	20	3	1.25	0	0.0403	0	61.1	45.13	53.11	3.49651	0	2.99573
0510C2	2005	10	4	C	28	7	2	5	1	3	2	100	25	3	1.25	0	0.0403	0	61.1	45.13	53.11	3.3322	1.60944	3.21888
0510C3	2005	10	4	C	40	9	4	3	2	4	2	99	25	3	1.25	0	0.0403	0	61.1	45.13	53.11	3.68888	1.09861	3.21888
0510C4	2005	10	4	C	29	10	5	1	2	3	3	95	15	3	1.25	0	0.0403	0	61.1	45.13	53.11	3.3673	0	2.70805
0510C5	2005	10	4	C	39	8	4	2	5	1	2	98	14	3	1.25	0	0.0403	0	61.1	45.13	53.11	3.66356	0.693147	2.63906
0510C6	2005	10	4	C	30	11	3	1	2	3	2	98	20	3	1.25	0	0.0403	0	61.1	45.13	53.11	3.4012	0	2.99573
0511B1	2005	11	1	B	83	22	18	1.5	6	6	6	15	60	2	1.49	15.5	0.0497	1	44.5	33.9	39.2	4.41884	0.405465	4.09434
0511B2	2005	11	1	B	65	23	18	2.5	6	1	4	5	35.4167	2	1.49	15.5	0.0497	1	44.5	33.9	39.2	4.17439	0.916291	3.56718
0511B3	2005	11	1	B	91	22	16	6	5	3	6	5	99	2	1.49	15.5	0.0497	1	44.5	33.9	39.2	4.51086	1.79176	4.59512
0511B4	2005	11	1	B	67	24	19	4	2	2	2	2	20	2	1.49	15.5	0.0497	1	44.5	33.9	39.2	4.20469	1.38629	2.99573
0511B5	2005	11	1	B	68	25	18	4	5	3	4	2	73.5	2	1.49	15.5	0.0497	1	44.5	33.9	39.2	4.21951	1.38629	4.29729
0511B6	2005	11	1	B	65	21	2	6	3	3	4	50	199.5	2	1.49	15.5	0.0497	1	44.5	33.9	39.2	4.17439	1.79176	5.29581
0511C1	2005	11	1	C	43	10	3	2	2	6	3	1	42	3	1.49	15.5	0.0497	1	44.5	33.9	39.2	3.7612	0.693147	3.73767
0511C2	2005	11	1	C	28	7	1	2	5	4	2	2	42	3	1.49	15.5	0.0497	1	44.5	33.9	39.2	3.3322	0.693147	3.73767
0511C3	2005	11	1	C	31	8	3	3	2	4	2	0	25	3	1.49	15.5	0.0497	1	44.5	33.9	39.2	3.43399	1.09861	3.21888
0511C4	2005	11	1	C	36	9	1	1	6	3	2	3	46.6667	3	1.49	15.5	0.0497	1	44.5	33.9	39.2	3.58352	0	3.84303
0511C5	2005	11	1	C	34	7	4	2	5	1	2	0	10.5	3	1.49	15.5	0.0497	1	44.5	33.9	39.2	3.52636	0.693147	2.35138
0511C6	2005	11	1	C	30	8	4	1	4	3	2	1	16.6667	3	1.49	15.5	0.0497	1	44.5	33.9	39.2	3.4012	0	2.81341
0512A1	2005	12	1	A	168	22	10	3	6	7	5	0	216	1	1.42	24.1	0.0458	1	37.48	28.97	33.23	5.12396	1.09861	5.37528
0512A3	2005	12	1	A	142	20	11	1	4	5	4	0	67.5	1	1.42	24.1	0.0458	1	37.48	28.97	33.23	4.95583	0	4.21213
0512A4	2005	12	1	A	228	22	11	5.5	6.5	5.5	6	0	253	1	1.42	24.1	0.0458	1	37.48	28.97	33.23	5.42935	1.70475	5.53339
0512A6	2005	12	1	A	171	21	12	6	7	5	9	0	273	1	1.42	24.1	0.0458	1	37.48	28.97	33.23	5.14166	1.79176	5.60947
0512B1	2005	12	1	B	71	19	7	2.5	2.5	4	3	2	70	2	1.42	24.1	0.0458	1	37.48	28.97	33.23	4.26268	0.916291	4.2485
0512B2	2005	12	1	B	74	19	15	2	4	2	3	1	20	2	1.42	24.1	0.0458	1	37.48	28.97	33.23	4.30407	0.693147	2.99573
0512B3	2005	12	1	B	85	20	9	5	4	3	5	1	132	2	1.42	24.1	0.0458	1	37.48	28.97	33.23	4.44265	1.60944	4.8828
0512B4	2005	12	1	B	70	15	10	2.5	2.5	2	0.5	0	10.4167	2	1.42	24.1	0.0458	1	37.48	28.97	33.23	4.2485	0.916291	2.34341
0512B5	2005	12	1	B	80	19	12	2.5	5	2	2	3	35	2	1.42	24.1	0.0458	1	37.48	28.97	33.23	4.38203	0.916291	3.55535
0512B6	2005	12	1	B	61	19	11	1.5	3.5	1	5	2	40	2	1.42	24.1	0.0458	1	37.48	28.97	33.23	4.11087	0.405465	3.68888
0512C1	2005	12	1	C	36	9.5	3	1.5	1	2	1	3	8.125	3	1.42	24.1	0.0458	1	37.48	28.97	33.23	3.58352	0.405465	2.09495
0512C2	2005	12	1	C	38	9	3	1	2	2	2	0	12	3	1.42	24.1	0.0458	1	37.48	28.97	33.23	3.63759	0	2.48491
0512C3	2005	12	1	C	42	10	4	2.5	1	1	1	0	7	3	1.42	24.1	0.0458	1	37.48	28.97	33.23	3.73767	0.916291	1.94591
0512C4	2005	12	1	C	35	7.8	2	2	1	3	2	1	14.5	3	1.42	24.1	0.0458	1	37.48	28.97	33.23	3.55535	0.693147	2.67415
0512C5	2005	12	1	C	40	9	4	2	1.5	1	1	1	5.83333	3	1.42	24.1	0.0458	1	37.48	28.97	33.23	3.68888	0.693147	1.76359
0512C6	2005	12	1	C	33	8	4	1	2	1	2	0	6	3	1.42	24.1	0.0458	1	37.48	28.97	33.23	3.49651	0	1.79176
0601B1	2006	1	1	B	63	18	14	1	4	1	4	0	16.6667	2	0.51	3.6	0.0165	1	33.81	23.35	28.58	4.14313	0	2.81341
0601B2	2006	1	1	B	63	18	14	3	4	2	3	0	23.3333	2	0.51	3.6	0.0165	1	33.81	23.35	28.58	4.14313	1.09861	3.14988
0601B3	2006	1	1	B	57	18	15	4	1	4	1	0	12.5	2	0.51	3.6	0.0165	1	33.81	23.35	28.58	4.04305	1.38629	2.52573
0601B4	2006	1	1	B	58	17	3	4	5	5	1	3	126	2	0.51	3.6	0.0165	1	33.81	23.35	28.58	4.06044	1.38629	4.83628
0601B5	2006	1	1	B	72	15	3	6	1	1	3	0	56	2	0.51	3.6	0.0165	1	33.81	23.35	28.58	4.27667	1.79176	4.02535
0601B6	2006	1	1	B	88	20	10	5	2	4	0.5	0	52.5	2	0.51	3.6	0.0165	1	33.81	23.35	28.58	4.47734	1.60944	3.96081
0602A2	2006	2	2	A	191	22	14	4	4	4	7	0	117.333	1	0.94	5.6	0.0336	1	37.46	27.61	32.54	5.25227	1.38629	4.76502
0602A3	2006	2	2	A	163	20	1	4	4	5	5	0	253.333	1	0.94	5.6	0.0336	1	37.46	27.61	32.54	5.09375	1.38629	5.53471
0602A6	2006	2	2	A	152	21	2	4	7	4	8	0	418	1	0.94	5.6	0.0336	1	37.46	27.61	32.54	5.02388	1.38629	6.03548
0602B1	2006	2	2	B	72	21	14	2	2	5	4	0	42	2	0.94	5.6	0.0336	1	37.46	27.61	32.54	4.27667	0.693147	3.73767
0602B3	2006	2	2	B	62	20	9	5	5	6	4	0	183.333	2	0.94	5.6	0.0336	1	37.46	27.61	32.54	4.12713	1.60944	5.21131
0602B4	2006	2	2	B	59	21	12	3	3	5	2	0	63	2	0.94	5.6	0.0336	1	37.46	27.61	32.54	4.07754	1.09861	4.14313
0602B6	2006	2	2	B	57	20	11	3	3	3	3	3	54	2	0.94	5.6	0.0336	1	37.46	27.61	32.54	4.04305	1.09861	3.98898
0602C2	2006	2	2	C	27	11	4	4	1	2	2	0	23.3333	3	0.94	5.6	0.0336	1	37.46	27.61	32.54	3.29584	1.38629	3.14988
0602C3	2006	2	2	C	35	10.5	4	1	4	5	1	2	32.5	3	0.94	5.6	0.0336	1	37.46	27.61	32.54	3.55535	0	3.48124
0602C4	2006	2	2	C	25	8	5	1	2	4	3	3	10.5	3	0.94	5.6	0.0336	1	37.46	27.61	32.54	3.21888	0	2.35138
0602C5	2006	2	2	C	26	7	2	2	2	2	3	0	16.6667	3	0.94	5.6	0.0336	1	37.46	27.61	32.54	3.2581	0.693147	2.81341
0602C6	2006	2	2	C	28	8	3	4	1	1	2	1	12.5	3	0.94	5.6	0.0336	1	37.46	27.61	32.54	3.3322	1.38629	2.52573
0603A1	2006	3	2	A	197	19	6	6	6	6	7	0	338	1	2.22	27.2	0.0716	1	44.61	30	37.31	5.2832	1.79176	5.82305
0603A2	2006	3	2	A	152	22	10	3	4	2	4	0	84	1	2.22	27.2	0.0716	1	44.61	30	37.31	5.02388	1.09861	4.43082
0603A3	2006	3	2	A	162	19	5	5	5	5	7	0	280	1	2.22	27.2	0.0716	1	44.61	30	37.31	5.0876	1.60944	5.63479
0603A4	2006	3	2	A	207	24	8	5	6	4	6	0	293.333	1	2.22	27.2	0.0716	1	44.61	30	37.31	5.33272	1.60944	5.68131
0603A5	2006	3	2	A	210	22	9	4	6	12	12	1	520	1	2.22	27.2	0.0716	1	44.61	30	37.31	5.34711	1.38629	6.25383
0603A6	2006	3	2	A	160	22	1	6	3	8	5	1	409.5	1	2.22	27.2	0.0716	1	44.61	30	37.31	5.07517	1.79176	6.01494
0603B2	2006	3	2	B	58	16	12	4	2	4	4	1	32	2	2.22	27.2	0.0716	1	44.61	30	37.31	4.06044	1.38629	3.46574
0603B3	2006	3	2	B	91	18	1	3	3	5	4	1	153	2	2.22	27.2	0.0716	1	44.61	30	37.31	4.51086	1.09861	5.03044
0603B4	2006	3	2	B	65	17	8	3	4	3	3	5	63	2	2.22	27.2	0.0716	1	44.61	30	37.31	4.17439	1.09861	4.14313
0603B5	2006	3	2	B	62	16	11	2	2	2	2	3	13.3333	2	2.22	27.2	0.0716	1	44.61	30	37.31	4.12713	0.693147	2.59027
0603B6	2006	3	2	B	56	16	1	3	3	2	2	1	60	2	2.22	27.2	0.0716	1	44.61	30	37.31	4.02535	1.09861	4.09434
0603C1	2006	3	2	C	29	8	4	1	1	5	2	0	9.33333	3	2.22	27.2	0.0716	1	44.61	30	37.31	3.3673	0	2.23359
0603C2	2006	3	2	C	28	8	3	2	1	4	1	1	12.5	3	2.22	27.2	0.0716	1	44.61	30	37.31	3.3322	0.693147	2.52573
0603C3	2006	3	2	C	33	9	4	1.5	2	1	4	1	14.5833	3	2.22	27.2	0.0716	1	44.61	30	37.31	3.49651	0.405465	2.67988
0603C4	2006	3	2	C	41	10	3	3	2	1	2	2	17.5	3	2.22	27.2	0.0716	1	44.61	30	37.31	3.71357	1.09861	2.8622
0603C5	2006	3	2	C	30	8	2	1	1	2	1	0	6	3	2.22	27.2	0.0716	1	44.61	30	37.31	3.4012	0	1.79176
0603C6	2006	3	2	C	32	8	3	2	2	1	2	0	10	3	2.22	27.2	0.0716	1	44.61	30	37.31	3.46574	0.693147	2.30259
0604A1	2006	4	2	A	143	20	3	3	4	6	4	0	198.333	1	1.6	0	0.0533	0	57.57	40.83	49.2	4.96284	1.09861	5.28995
0604A2	2006	4	2	A	219	22	7	7	7	5	9	0	490	1	1.6	0	0.0533	0	57.57	40.83	49.2	5.38907	1.94591	6.19441
0604A3	2006	4	2	A	144	23	6	4	4	4	2	1	136	1	1.6	0	0.0533	0	57.57	40.83	49.2	4.96981	1.38629	4.91265
0604A4	2006	4	2	A	162	23	2	5	6	7	3	0	385	1	1.6	0	0.0533	0	57.57	40.83	49.2	5.0876	1.60944	5.95324
0604A5	2006	4	2	A	228	26	9	10	9	9	8	0	915.167	1	1.6	0	0.0533	0	57.57	40.83	49.2	5.42935	2.30259	6.81911
0604A6	2006	4	2	A	176	24	14	6	7	6	3	0	195	1	1.6	0	0.0533	0	57.57	40.83	49.2	5.17048	1.79176	5.273
0604B1	2006	4	2	B	60	16	6	2	3	5	1	0	50	2	1.6	0	0.0533	0	57.57	40.83	49.2	4.09434	0.693147	3.91202
0604B2	2006	4	2	B	79	17	9	6	5	5	3	1	117.333	2	1.6	0	0.0533	0	57.57	40.83	49.2	4.36945	1.79176	4.76502
0604B3	2006	4	2	B	59	19	7	5	2	6	3	1	126	2	1.6	0	0.0533	0	57.57	40.83	49.2	4.07754	1.60944	4.83628
0604B4	2006	4	2	B	69	21	11	5	3	3	3	0	80	2	1.6	0	0.0533	0	57.57	40.83	49.2	4.23411	1.60944	4.38203
0604B5	2006	4	2	B	81	21	10	4	5	3	4	1	115.5	2	1.6	0	0.0533	0	57.57	40.83	49.2	4.39445	1.38629	4.74927
0604B6	2006	4	2	B	57	17	2	3	2	3	3	1	75	2	1.6	0	0.0533	0	57.57	40.83	49.2	4.04305	1.09861	4.31749
0604C1	2006	4	2	C	33	8	2	3	4	2	1	1	21	3	1.6	0	0.0533	0	57.57	40.83	49.2	3.49651	1.09861	3.04452
0604C2	2006	4	2	C	35	10	4	3	3	2	3	3	30	3	1.6	0	0.0533	0	57.57	40.83	49.2	3.55535	1.09861	3.4012
0604C3	2006	4	2	C	28	9	4	1	5	2	3	0	25	3	1.6	0	0.0533	0	57.57	40.83	49.2	3.3322	0	3.21888
0604C4	2006	4	2	C	25	7	3	4	3	4	2	0	28	3	1.6	0	0.0533	0	57.57	40.83	49.2	3.21888	1.38629	3.3322
0604C5	2006	4	2	C	39	11	3	2	1	2	4	1	24	3	1.6	0	0.0533	0	57.57	40.83	49.2	3.66356	0.693147	3.17805
0604C6	2006	4	2	C	29	8	2.5	1	1	4	2	0	11	3	1.6	0	0.0533	0	57.57	40.83	49.2	3.3673	0	2.3979
0605A1	2006	5	3	A	171	22	13	4	8	3	6	100	162	1	2.55	0	0.0823	0	67.87	47.45	57.66	5.14166	1.38629	5.0876
0605A2	2006	5	3	A	144	20	6	5	6	4	6	100	256.667	1	2.55	0	0.0823	0	67.87	47.45	57.66	4.96981	1.60944	5.54778
0605A3	2006	5	3	A	175	21	12	3	2	3	5	100	60	1	2.55	0	0.0823	0	67.87	47.45	57.66	5.16479	1.09861	4.09434
0605A4	2006	5	3	A	213	21	12	3	5	6	6	100	144	1	2.55	0	0.0823	0	67.87	47.45	57.66	5.36129	1.09861	4.96981
0605A5	2006	5	3	A	255	21	12	7	6	6	7	95	253.5	1	2.55	0	0.0823	0	67.87	47.45	57.66	5.54126	1.94591	5.53536
0605A6	2006	5	3	A	193	22	10	4	6	5	4	100	180	1	2.55	0	0.0823	0	67.87	47.45	57.66	5.26269	1.38629	5.19296
0605B1	2006	5	3	B	58	18	11	4	1	3	2	30	29.1667	2	2.55	0	0.0823	0	67.87	47.45	57.66	4.06044	1.38629	3.37303
0605B2	2006	5	3	B	67	17	2	5	3	5	3	95	160	2	2.55	0	0.0823	0	67.87	47.45	57.66	4.20469	1.60944	5.07517
0605B3	2006	5	3	B	61	19	7	4	2	5	2	20	84	2	2.55	0	0.0823	0	67.87	47.45	57.66	4.11087	1.38629	4.43082
0605B4	2006	5	3	B	56	17	7	1	2	3	1	70	20	2	2.55	0	0.0823	0	67.87	47.45	57.66	4.02535	0	2.99573
0605B5	2006	5	3	B	51	15	2	2	2	2	2	100	34.6667	2	2.55	0	0.0823	0	67.87	47.45	57.66	3.93183	0.693147	3.54578
0605B6	2006	5	3	B	60	16	10	2	2	4	2.5	100	26	2	2.55	0	0.0823	0	67.87	47.45	57.66	4.09434	0.693147	3.2581
0605C1	2006	5	3	C	26	8	2	1	3	2	1	100	12	3	2.55	0	0.0823	0	67.87	47.45	57.66	3.2581	0	2.48491
0605C2	2006	5	3	C	28	9	3	3	2	1	1	100	10	3	2.55	0	0.0823	0	67.87	47.45	57.66	3.3322	1.09861	2.30259
0605C3	2006	5	3	C	36	9	3	4	1	2	2	100	20	3	2.55	0	0.0823	0	67.87	47.45	57.66	3.58352	1.38629	2.99573
0605C4	2006	5	3	C	30	8	3	1	2	2	1	98	7.5	3	2.55	0	0.0823	0	67.87	47.45	57.66	3.4012	0	2.0149
0605C5	2006	5	3	C	24	7	4	3	1	1	1	99	4	3	2.55	0	0.0823	0	67.87	47.45	57.66	3.17805	1.09861	1.38629
0605C6	2006	5	3	C	31	9	2	2	2	1	2	100	14	3	2.55	0	0.0823	0	67.87	47.45	57.66	3.43399	0.693147	2.63906
0606A1	2006	6	3	A	155	20	1	3	6	5	6	100	313.5	1	1.7	0	0.0567	0	74.97	53.2	64.08	5.04343	1.09861	5.7478
0606A2	2006	6	3	A	201	21	1	5	5	5	7	100	400	1	1.7	0	0.0567	0	74.97	53.2	64.08	5.3033	1.60944	5.99146
0606A3	2006	6	3	A	178	23	1	5	5	3	7	100	366.667	1	1.7	0	0.0567	0	74.97	53.2	64.08	5.18178	1.60944	5.90445
0606A4	2006	6	3	A	192	21	1	4	3	4	5	100	210	1	1.7	0	0.0567	0	74.97	53.2	64.08	5.2575	1.38629	5.34711
0606A5	2006	6	3	A	191	21	1	8	5	5	6	100	476.667	1	1.7	0	0.0567	0	74.97	53.2	64.08	5.25227	2.07944	6.16682
0606A6	2006	6	3	A	223	24	13	6	6	6	6	95	264	1	1.7	0	0.0567	0	74.97	53.2	64.08	5.40717	1.79176	5.57595
0606B1	2006	6	3	B	46	16	12	2	1.5	1.5	1	100	5.83333	2	1.7	0	0.0567	0	74.97	53.2	64.08	3.82864	0.693147	1.76359
0606B2	2006	6	3	B	47	16	1	2	2	2	1	100	30	2	1.7	0	0.0567	0	74.97	53.2	64.08	3.85015	0.693147	3.4012
0606B3	2006	6	3	B	67	16	9	1	3	1.5	2	100	16.3333	2	1.7	0	0.0567	0	74.97	53.2	64.08	4.20469	0	2.79321
0606B4	2006	6	3	B	60	15	9	1.5	3	1.5	1	100	11.25	2	1.7	0	0.0567	0	74.97	53.2	64.08	4.09434	0.405465	2.42037
0606B5	2006	6	3	B	57	16	11	1	3	2	1.5	100	11.6667	2	1.7	0	0.0567	0	74.97	53.2	64.08	4.04305	0	2.45674
0606B6	2006	6	3	B	66	18	7	2	2	3	2	100	36.6667	2	1.7	0	0.0567	0	74.97	53.2	64.08	4.18965	0.693147	3.60187
0606C1	2006	6	3	C	38	10	3	3	2	4	3	100	40.8333	3	1.7	0	0.0567	0	74.97	53.2	64.08	3.63759	1.09861	3.7095
0606C2	2006	6	3	C	29	8	3	2	1	3	1	100	10	3	1.7	0	0.0567	0	74.97	53.2	64.08	3.3673	0.693147	2.30259
0606C3	2006	6	3	C	31	9	4	3	2	2	1	100	12.5	3	1.7	0	0.0567	0	74.97	53.2	64.08	3.43399	1.09861	2.52573
0606C4	2006	6	3	C	33	9	2	4	2	3	1	100	28	3	1.7	0	0.0567	0	74.97	53.2	64.08	3.49651	1.38629	3.3322
0606C5	2006	6	3	C	26	7	2	2	1	2	2	100	10	3	1.7	0	0.0567	0	74.97	53.2	64.08	3.2581	0.693147	2.30259
0606C6	2006	6	3	C	25	7	2	5	1	2	1	100	15	3	1.7	0	0.0567	0	74.97	53.2	64.08	3.21888	1.60944	2.70805
0607A1	2006	7	3	A	171	20	1	4	5	4	5	100	256.5	1	3.73	0	0.1203	0	86.19	62.06	74.13	5.14166	1.38629	5.54713
0607A2	2006	7	3	A	216	20	13	3	4	2	6	100	65.3333	1	3.73	0	0.1203	0	86.19	62.06	74.13	5.37528	1.09861	4.1795
0607A3	2006	7	3	A	203	23	14	4	6	6	5	100	165	1	3.73	0	0.1203	0	86.19	62.06	74.13	5.31321	1.38629	5.10595
0607A4	2006	7	3	A	168	22	2	4	7	4	3	100	256.667	1	3.73	0	0.1203	0	86.19	62.06	74.13	5.12396	1.38629	5.54778
0607A5	2006	7	3	A	181	22	10	6	6	7	5	100	288	1	3.73	0	0.1203	0	86.19	62.06	74.13	5.1985	1.79176	5.66296
0607A6	2006	7	3	A	210	22	13	6	4	6	4	100	150	1	3.73	0	0.1203	0	86.19	62.06	74.13	5.34711	1.79176	5.01064
0607B1	2006	7	3	B	52	15	0	3	2	3	2	100	62.5	2	3.73	0	0.1203	0	86.19	62.06	74.13	3.95124	1.09861	4.13517
0607B2	2006	7	3	B	60	15	4	2	1	1	2	100	16.5	2	3.73	0	0.1203	0	86.19	62.06	74.13	4.09434	0.693147	2.80336
0607B3	2006	7	3	B	67	16	12	2.5	2.5	2	4	100	20	2	3.73	0	0.1203	0	86.19	62.06	74.13	4.20469	0.916291	2.99573
0607B4	2006	7	3	B	67	16	0	2	2	3	1	100	42.6667	2	3.73	0	0.1203	0	86.19	62.06	74.13	4.20469	0.693147	3.75342
0607B5	2006	7	3	B	54	15	12	1	3	2	1.5	100	7	2	3.73	0	0.1203	0	86.19	62.06	74.13	3.98898	0	1.94591
0607B6	2006	7	3	B	52	15	13	1	1	2	1	100	2	2	3.73	0	0.1203	0	86.19	62.06	74.13	3.95124	0	0.693147
0607C1	2006	7	3	C	28	9	4	2	1	3	2	100	12.5	3	3.73	0	0.1203	0	86.19	62.06	74.13	3.3322	0.693147	2.52573
0607C2	2006	7	3	C	36	10	5	3	4	5	2	100	40.8333	3	3.73	0	0.1203	0	86.19	62.06	74.13	3.58352	1.09861	3.7095
0607C3	2006	7	3	C	35	8	3	3	3	2	3	98	25	3	3.73	0	0.1203	0	86.19	62.06	74.13	3.55535	1.09861	3.21888
0607C4	2006	7	3	C	33	9	3	2	1	2	2	100	12	3	3.73	0	0.1203	0	86.19	62.06	74.13	3.49651	0.693147	2.48491
0607C5	2006	7	3	C	31	9	4	3	2	1	2	100	12.5	3	3.73	0	0.1203	0	86.19	62.06	74.13	3.43399	1.09861	2.52573
0607C6	2006	7	3	C	33	9	3	2	2	1	2	100	12	3	3.73	0	0.1203	0	86.19	62.06	74.13	3.49651	0.693147	2.48491
0608A1	2006	8	4	A	210	23	6	4	6	7	3	100	283.333	1	3.76	0	0.1213	0	69.45	53.68	61.56	5.34711	1.38629	5.64662
0608A2	2006	8	4	A	185	20	10	4	4	5	4	100	120	1	3.76	0	0.1213	0	69.45	53.68	61.56	5.22036	1.38629	4.78749
0608A3	2006	8	4	A	192	20	8	5	3	5	5	100	160	1	3.76	0	0.1213	0	69.45	53.68	61.56	5.2575	1.60944	5.07517
0608A4	2006	8	4	A	196	20	6	4	4	4	5	100	168	1	3.76	0	0.1213	0	69.45	53.68	61.56	5.27811	1.38629	5.12396
0608A5	2006	8	4	A	213	21	10	5	8	4	7	100	262.167	1	3.76	0	0.1213	0	69.45	53.68	61.56	5.36129	1.60944	5.56898
0608A6	2006	8	4	A	187	23	10	7	5	3	7	100	260	1	3.76	0	0.1213	0	69.45	53.68	61.56	5.23111	1.94591	5.56068
0608B1	2006	8	4	B	58	16	12	3	2	1	3	95	13.3333	2	3.76	0	0.1213	0	69.45	53.68	61.56	4.06044	1.09861	2.59027
0608B2	2006	8	4	B	61	15	1	2	3	2	4	100	70	2	3.76	0	0.1213	0	69.45	53.68	61.56	4.11087	0.693147	4.2485
0608B3	2006	8	4	B	54	16	11	2	2	2	3	100	16.6667	2	3.76	0	0.1213	0	69.45	53.68	61.56	3.98898	0.693147	2.81341
0608B4	2006	8	4	B	81	16	10	3	2.5	3.5	4	100	41.25	2	3.76	0	0.1213	0	69.45	53.68	61.56	4.39445	1.09861	3.71965
0608B5	2006	8	4	B	68	17	15	2	2	2	3	90	6.66667	2	3.76	0	0.1213	0	69.45	53.68	61.56	4.21951	0.693147	1.89712
0608B6	2006	8	4	B	61	19	12	2	5	4	2	100	49	2	3.76	0	0.1213	0	69.45	53.68	61.56	4.11087	0.693147	3.89182
0608C1	2006	8	4	C	26	7	2	2	1.5	1	2	100	8.75	3	3.76	0	0.1213	0	69.45	53.68	61.56	3.2581	0.693147	2.16905
0608C2	2006	8	4	C	24	7	2	3	1	2	1	100	10	3	3.76	0	0.1213	0	69.45	53.68	61.56	3.17805	1.09861	2.30259
0608C3	2006	8	4	C	25	8	3	2	1	1.5	1	100	6.25	3	3.76	0	0.1213	0	69.45	53.68	61.56	3.21888	0.693147	1.83258
0608C4	2006	8	4	C	26	8	2	2	1	1	2	100	9	3	3.76	0	0.1213	0	69.45	53.68	61.56	3.2581	0.693147	2.19722
0608C5	2006	8	4	C	22	7	1	2	3	1	1	100	10	3	3.76	0	0.1213	0	69.45	53.68	61.56	3.09104	0.693147	2.30259
0608C6	2006	8	4	C	23	7	2	2.5	1	1	3	100	11.6667	3	3.76	0	0.1213	0	69.45	53.68	61.56	3.13549	0.916291	2.45674
0609A2	2006	9	4	A	146	21	4	4	4	2	5	100	158.667	1	2.51	0	0.0837	0	74.67	54.2	64.43	4.98361	1.38629	5.06681
0609A3	2006	9	4	A	147	18	3	2	4	4	4	100	120	1	2.51	0	0.0837	0	74.67	54.2	64.43	4.99043	0.693147	4.78749
0609A4	2006	9	4	A	197	21	2	5	4	5	6	100	313.5	1	2.51	0	0.0837	0	74.67	54.2	64.43	5.2832	1.60944	5.7478
0609A6	2006	9	4	A	180	21	10	5	6	6	3	100	181.5	1	2.51	0	0.0837	0	74.67	54.2	64.43	5.19296	1.60944	5.20126
0609B1	2006	9	4	B	60	15	9	3	3	4	3	100	42	2	2.51	0	0.0837	0	74.67	54.2	64.43	4.09434	1.09861	3.73767
0609B2	2006	9	4	B	61	15	13	2	3	2	2	90	6.66667	2	2.51	0	0.0837	0	74.67	54.2	64.43	4.11087	0.693147	1.89712
0609B3	2006	9	4	B	70	16	1	3	1	2	4	100	60	2	2.51	0	0.0837	0	74.67	54.2	64.43	4.2485	1.09861	4.09434
0609B4	2006	9	4	B	61	15	12	2	1	2	2	90	6	2	2.51	0	0.0837	0	74.67	54.2	64.43	4.11087	0.693147	1.79176
0609B5	2006	9	4	B	49	13	1	1	4	2	2	100	40	2	2.51	0	0.0837	0	74.67	54.2	64.43	3.89182	0	3.68888
0609B6	2006	9	4	B	57	16	9	3	3	1	4	100	35	2	2.51	0	0.0837	0	74.67	54.2	64.43	4.04305	1.09861	3.55535
0609C1	2006	9	4	C	31	10	4	2	1	2	1	100	9	3	2.51	0	0.0837	0	74.67	54.2	64.43	3.43399	0.693147	2.19722
0609C2	2006	9	4	C	30	9	3	2	3.5	1	1	100	11	3	2.51	0	0.0837	0	74.67	54.2	64.43	3.4012	0.693147	2.3979
0609C3	2006	9	4	C	35	10	4	3	2	2	1	100	15	3	2.51	0	0.0837	0	74.67	54.2	64.43	3.55535	1.09861	2.70805
0609C4	2006	9	4	C	33	8	3	2	2	3	2	100	16.6667	3	2.51	0	0.0837	0	74.67	54.2	64.43	3.49651	0.693147	2.81341
0609C5	2006	9	4	C	25	7	2	1	1	3	1	100	6.66667	3	2.51	0	0.0837	0	74.67	54.2	64.43	3.21888	0	1.89712
0609C6	2006	9	4	C	28	8	3	2	1	4	1	100	12.5	3	2.51	0	0.0837	0	74.67	54.2	64.43	3.3322	0.693147	2.52573
0610A1	2006	10	4	A	175	22	14	3	3	5	6	100	88	1	2.88	0	0.0929	0	62.81	46.97	54.89	5.16479	1.09861	4.47734
0610A2	2006	10	4	A	153	21	8	3	3	4	6	100	130	1	2.88	0	0.0929	0	62.81	46.97	54.89	5.03044	1.09861	4.86753
0610A3	2006	10	4	A	233	21	11	6	6	6	9	100	300	1	2.88	0	0.0929	0	62.81	46.97	54.89	5.45104	1.79176	5.70378
0610A4	2006	10	4	A	181	21	1	5	4	3	4	100	210	1	2.88	0	0.0929	0	62.81	46.97	54.89	5.1985	1.60944	5.34711
0610A5	2006	10	4	A	165	21	8	5	5	5	5	100	216.667	1	2.88	0	0.0929	0	62.81	46.97	54.89	5.10595	1.60944	5.37836
0610A6	2006	10	4	A	188	20	5	6	4	6	5	100	275	1	2.88	0	0.0929	0	62.81	46.97	54.89	5.23644	1.79176	5.61677
0610B1	2006	10	4	B	57	15	2	3	5	3	3	100	104	2	2.88	0	0.0929	0	62.81	46.97	54.89	4.04305	1.09861	4.64439
0610B2	2006	10	4	B	56	16	2	2	3	1	2	100	35	2	2.88	0	0.0929	0	62.81	46.97	54.89	4.02535	0.693147	3.55535
0610B3	2006	10	4	B	65	17	1	2	2	2	3	100	53.3333	2	2.88	0	0.0929	0	62.81	46.97	54.89	4.17439	0.693147	3.97656
0610B4	2006	10	4	B	55	18	10	2	3	2	3	100	33.3333	2	2.88	0	0.0929	0	62.81	46.97	54.89	4.00733	0.693147	3.50656
0610B5	2006	10	4	B	76	16	1	3	2	2	4	90	75	2	2.88	0	0.0929	0	62.81	46.97	54.89	4.33073	1.09861	4.31749
0610B6	2006	10	4	B	61	16	9	3	1	3	2	100	23.3333	2	2.88	0	0.0929	0	62.81	46.97	54.89	4.11087	1.09861	3.14988
0610C1	2006	10	4	C	25	8	2	1	2	1	1	100	6	3	2.88	0	0.0929	0	62.81	46.97	54.89	3.21888	0	1.79176
0610C2	2006	10	4	C	38	11	3	3	1	1	2	100	16	3	2.88	0	0.0929	0	62.81	46.97	54.89	3.63759	1.09861	2.77259
0610C3	2006	10	4	C	32	10	4	2.5	1	2	1	100	10.5	3	2.88	0	0.0929	0	62.81	46.97	54.89	3.46574	0.916291	2.35138
0610C4	2006	10	4	C	35	9	3	1	1	2	1	100	6	3	2.88	0	0.0929	0	62.81	46.97	54.89	3.55535	0	1.79176
0610C5	2006	10	4	C	31	8	4	2	1.5	1	1	100	4.66667	3	2.88	0	0.0929	0	62.81	46.97	54.89	3.43399	0.693147	1.54045
0610C6	2006	10	4	C	30	9	3	3	1	1	1	100	8	3	2.88	0	0.0929	0	62.81	46.97	54.89	3.4012	1.09861	2.07944
0706A2	2007	6	3	A	143	20	12	7	4	5	3	100	117.333	1	3.92	0	0.1307	0	74.87	56.53	65.7	4.96284	1.94591	4.76502
0706A4	2007	6	3	A	195	20	7	3	4	5	5	100	151.667	1	3.92	0	0.1307	0	74.87	56.53	65.7	5.273	1.09861	5.02169
0706A5	2007	6	3	A	219	21	11	4	4	4	3	100	93.3333	1	3.92	0	0.1307	0	74.87	56.53	65.7	5.38907	1.38629	4.53618
0706A6	2007	6	3	A	122	20	8	3	3	2	3	100	60	1	3.92	0	0.1307	0	74.87	56.53	65.7	4.80402	1.09861	4.09434
0706B2	2007	6	3	B	54	17	14	1.5	2	2	1	100	5.25	2	3.92	0	0.1307	0	74.87	56.53	65.7	3.98898	0.405465	1.65823
0706B3	2007	6	3	B	55	15	12	1	2.5	1.5	1	100	4.375	2	3.92	0	0.1307	0	74.87	56.53	65.7	4.00733	0	1.47591
0706B4	2007	6	3	B	51	16	14	1	1	1	1	100	1.33333	2	3.92	0	0.1307	0	74.87	56.53	65.7	3.93183	0	0.287682
0706C1	2007	6	3	C	44	12	6	2	1	1.5	1	100	7.5	3	3.92	0	0.1307	0	74.87	56.53	65.7	3.78419	0.693147	2.0149
0706C2	2007	6	3	C	35	10	4	3	1	2	1	100	12	3	3.92	0	0.1307	0	74.87	56.53	65.7	3.55535	1.09861	2.48491
0706C3	2007	6	3	C	32	10	5	1.5	2.5	2.5	1	100	11.6667	3	3.92	0	0.1307	0	74.87	56.53	65.7	3.46574	0.405465	2.45674
0706C4	2007	6	3	C	33	9	4	3	2	1	3	100	16.6667	3	3.92	0	0.1307	0	74.87	56.53	65.7	3.49651	1.09861	2.81341
0706C5	2007	6	3	C	28	8	4	3	1	2	1	100	8	3	3.92	0	0.1307	0	74.87	56.53	65.7	3.3322	1.09861	2.07944
0706C6	2007	6	3	C	30	9	3	2	1	2	2	100	12	3	3.92	0	0.1307	0	74.87	56.53	65.7	3.4012	0.693147	2.48491
0708A1	2007	8	4	A	192	20	12	3	3	3	7	95	80	1	2.84	0	0.0916	0	73.71	54.87	64.29	5.2575	1.09861	4.38203
0708A2	2007	8	4	A	260	19	7	7	7	7	7	100	392	1	2.84	0	0.0916	0	73.71	54.87	64.29	5.56068	1.94591	5.97126
0708A3	2007	8	4	A	173	19	6	7	7	7	7	100	424.667	1	2.84	0	0.0916	0	73.71	54.87	64.29	5.15329	1.94591	6.0513
0708A4	2007	8	4	A	180	22	14	5	6	3	7	100	146.667	1	2.84	0	0.0916	0	73.71	54.87	64.29	5.19296	1.60944	4.98816
0708A5	2007	8	4	A	201	21	8	3	4	5	7	100	182	1	2.84	0	0.0916	0	73.71	54.87	64.29	5.3033	1.09861	5.20401
0708A6	2007	8	4	A	155	19	5	3	6	4	6	100	210	1	2.84	0	0.0916	0	73.71	54.87	64.29	5.04343	1.09861	5.34711
0708B1	2007	8	4	B	65	15	1	1	2	3	1	100	28	2	2.84	0	0.0916	0	73.71	54.87	64.29	4.17439	0	3.3322
0708B2	2007	8	4	B	55	15	1	2	4	1	4	100	70	2	2.84	0	0.0916	0	73.71	54.87	64.29	4.00733	0.693147	4.2485
0708B3	2007	8	4	B	65	15	6	2	3	2	3	100	37.5	2	2.84	0	0.0916	0	73.71	54.87	64.29	4.17439	0.693147	3.62434
0708B4	2007	8	4	B	70	16	6	1	3	3	3	100	40	2	2.84	0	0.0916	0	73.71	54.87	64.29	4.2485	0	3.68888
0708B5	2007	8	4	B	69	16	1	3	4	2	3	100	87.5	2	2.84	0	0.0916	0	73.71	54.87	64.29	4.23411	1.09861	4.47164
0708B6	2007	8	4	B	62	18	2	2	2	3	5	100	85.3333	2	2.84	0	0.0916	0	73.71	54.87	64.29	4.12713	0.693147	4.44657
0708C1	2007	8	4	C	25	7	2	1	2	2	1	100	7.5	3	2.84	0	0.0916	0	73.71	54.87	64.29	3.21888	0	2.0149
0708C2	2007	8	4	C	26	7	1	1	1	1	2	100	6	3	2.84	0	0.0916	0	73.71	54.87	64.29	3.2581	0	1.79176
0708C3	2007	8	4	C	25	6	2	3	1	1	2	100	8	3	2.84	0	0.0916	0	73.71	54.87	64.29	3.21888	1.09861	2.07944
0708C4	2007	8	4	C	22	6	2	2.5	1	1.5	1	100	5.83333	3	2.84	0	0.0916	0	73.71	54.87	64.29	3.09104	0.916291	1.76359
0708C5	2007	8	4	C	27	7	2	2	1	3	1	100	10	3	2.84	0	0.0916	0	73.71	54.87	64.29	3.29584	0.693147	2.30259
0708C6	2007	8	4	C	25	7	1	1	1	2	3	100	10	3	2.84	0	0.0916	0	73.71	54.87	64.29	3.21888	0	2.30259
0710A1	2007	10	4	A	179	20	7	5	6	5	5	95	238.333	1	0.23	0	0.0074	0	56.71	40.9	48.81	5.18739	1.60944	5.47367
0710A2	2007	10	4	A	174	23	11	3	4	6	4	95	140	1	0.23	0	0.0074	0	56.71	40.9	48.81	4.30407	1.09861	4.94164
0710A3	2007	10	4	A	193	23	6	7	3	4	5	100	255	1	0.23	0	0.0074	0	56.71	40.9	48.81	5.26269	1.94591	5.54126
0710A4	2007	10	4	A	141	21	9	2	3	2	4	100	60	1	0.23	0	0.0074	0	56.71	40.9	48.81	6.608	0.693147	4.09434
0710A5	2007	10	4	A	218	24	12	4	6	7	6	95	260	1	0.23	0	0.0074	0	56.71	40.9	48.81	5.3845	1.38629	5.56068
0710A6	2007	10	4	A	206	23	7	4	7	4	7	100	322.667	1	0.23	0	0.0074	0	56.71	40.9	48.81	5.32788	1.38629	5.77662
0710B1	2007	10	4	B	65	16	1	2	2	3	4	90	70	2	0.23	0	0.0074	0	56.71	40.9	48.81	4.17439	0.693147	4.2485
0710B2	2007	10	4	B	51	18	1	2	3	2	2	100	56.6667	2	0.23	0	0.0074	0	56.71	40.9	48.81	3.93183	0.693147	4.03719
0710B3	2007	10	4	B	69	18	11	2	3	2	3	95	29.1667	2	0.23	0	0.0074	0	56.71	40.9	48.81	4.23411	0.693147	3.37303
0710B4	2007	10	4	B	79	20	15	1	2	3	2	95	12.5	2	0.23	0	0.0074	0	56.71	40.9	48.81	4.36945	0	2.52573
0710B5	2007	10	4	B	61	18	9	3	2	3	1	100	30	2	0.23	0	0.0074	0	56.71	40.9	48.81	4.11087	1.09861	3.4012
0710B6	2007	10	4	B	54	18	15	1	3	2	2	95	8	2	0.23	0	0.0074	0	56.71	40.9	48.81	3.98898	0	2.07944
0710C1	2007	10	4	C	29	9	2	1.5	2	1	2	100	12.25	3	0.23	0	0.0074	0	56.71	40.9	48.81	3.3673	0.405465	2.50553
0710C2	2007	10	4	C	36	10	5	3	1	1	2	98	10	3	0.23	0	0.0074	0	56.71	40.9	48.81	3.58352	1.09861	2.30259
0710C3	2007	10	4	C	32	9	3	1	2.5	2	2	96	14	3	0.23	0	0.0074	0	56.71	40.9	48.81	3.46574	0	2.63906
0710C4	2007	10	4	C	37	10	4	3	3	2	1	100	18	3	0.23	0	0.0074	0	56.71	40.9	48.81	3.61092	1.09861	2.89037
0710C5	2007	10	4	C	33	8	3	1	1	2	2	100	6.66667	3	0.23	0	0.0074	0	56.71	40.9	48.81	3.49651	0	1.89712
0710C6	2007	10	4	C	27	8	2	2	1	1.5	1	99	7.5	3	0.23	0	0.0074	0	56.71	40.9	48.81	3.29584	0.693147	2.0149

## Sheet: spider xy
	x	y
0506A1	204.5	106
0506A2	217.5	94
0506A3	217.5	102.2
0506A4	228.5	87.2
0506A5	239.6	105
0506A6	249.8	91.4
0506B1	31	5
0506B2	39.3	5
0506B3	29.1	10.4
0506B4	41.9	12.4
0506B5	43.4	13.9
0506B6	33.7	13.9
0506C1	150	170
0506C2	150	171.436
0506C3	150	172.707
0506C4	151.983	172.707
0506C5	151.983	174.573
0506C6	153.184	174.573
0508A2	214	10
0508A3	214	18
0508A4	223	24
0508A5	231	14
0508A6	241	18
0508B1	26.3	19
0508B2	35.3	25
0508B3	35.3	28
0508B4	30.3	30
0508B5	38.3	30
0508B6	30.3	32
0508C1	154	170
0508C2	155.855	170
0508C3	155.855	171.123
0508C4	155.855	170.025
0508C5	156.971	170.025
0508C6	158.851	170.025
0510A1	238	20
0510A2	248	27
0510A3	248	44
0510A4	234	44
0510A5	228	36
0510A6	216	44
0510B1	37.3	28
0510B2	33.3	38
0510B3	30.3	38
0510B4	48.3	25
0510B5	48.3	35
0510B6	54.3	35
0510C1	158	170
0510C2	158	168.717
0510C3	158	166.773
0510C4	158	165.737
0510C5	158	167.479
0510C6	158	168.808
0511B1	54.3	40
0511B2	44.3	42
0511B3	36.3	42
0511B4	32.3	43
0511B5	24.3	48
0511B6	29.3	48
0511C1	162	170
0511C2	162	171.244
0511C3	162	172.51
0511C4	163.309	172.51
0511C5	163.309	171.329
0511C6	163.309	172.652
0512A1	232	63
0512A3	238	63
0512A4	241	77
0512A6	241	101
0512B1	29.3	52
0512B2	35.3	49
0512B3	40.3	49
0512B4	44.3	46
0512B5	52.3	46
0512B6	52.3	34
0512C1	166	170
0512C2	167.044	170
0512C3	167.044	168.377
0512C4	168.084	168.377
0512C5	168.084	167.351
0512C6	168.084	168.582
0601B1	18.3	44
0601B2	13.3	44
0601B3	12.3	44
0601B4	10.3	42
0601B5	10.3	47
0601B6	12.3	48
0602A2	236	126
0602A3	251	126
0602A6	257	122
0602B1	14.3	49
0602B3	9.3	51
0602B4	7.3	51
0602B6	7.3	62
0602C2	170	168.342
0602C3	170	167.147
0602C4	170	168.616
0602C5	170	167.514
0602C6	171.836	167.514
0603A1	260	127
0603A2	267	122
0603A3	267	114
0603A4	275	122
0603A5	284	122
0603A6	279	115
0603B2	7.3	67
0603B3	9.8	63
0603B4	9.8	67
0603B5	10.3	68
0603B6	9.3	70
0603C1	174	170
0603C2	174	168.387
0603C3	175.642	168.387
0603C4	176.72	168.387
0603C5	176.72	167.052
0603C6	176.72	165.304
0604A1	279	110
0604A2	273	106
0604A3	266	99
0604A4	262	99
0604A5	256	99
0604A6	261	89
0604B1	9.3	72
0604B2	8.3	72
0604B3	7.3	70
0604B4	10.3	72
0604B5	15.3	70
0604B6	15.3	72
0604C1	178	170
0604C2	179.01	170
0604C3	180.956	170
0604C4	182.629	170
0604C5	182.629	168.401
0604C6	184.211	168.401
0605A1	268	89
0605A2	261	87
0605A3	258	93
0605A4	254	91
0605A5	254	79
0605A6	261	81
0605B1	10.3	76
0605B2	10.3	80
0605B3	12.3	80
0605B4	17.3	80
0605B5	17.3	86
0605B6	15.3	76
0605C1	182	170
0605C2	182	171.141
0605C3	182	169.22
0605C4	182	170.736
0605C5	183.736	170.736
0605C6	183.736	171.981
0606A1	242	83
0606A2	250	83
0606A3	262	77
0606A4	256	75
0606A5	256	83
0606A6	243	97
0606B1	15.3	77
0606B2	15.3	79
0606B3	20.3	77
0606B4	25.3	77
0606B5	17.3	82
0606B6	26.3	79
0606C1	186	170
0606C2	186	168.998
0606C3	187.59	168.998
0606C4	187.59	167.033
0606C5	189.437	167.033
0606C6	189.437	168.79
0607A1	256	97
0607A2	263	97
0607A3	263	91
0607A4	263	105
0607A5	267	105
0607A6	271	105
0607B1	18.3	88
0607B2	23.3	90
0607B3	21.3	88
0607B4	27.3	88
0607B5	27.3	92
0607B6	27.3	95
0607C1	190	170
0607C2	190	168.207
0607C3	190	166.52
0607C4	190	167.82
0607C5	190	166.426
0607C6	190	164.694
0608A1	271	120
0608A2	271	134
0608A3	281	132
0608A4	290	129
0608A5	294	132
0608A6	285	117
0608B1	31.3	89
0608B2	31.3	83
0608B3	37.3	83
0608B4	35.3	77
0608B5	29.3	77
0608B6	39.3	72
0608C1	194	170
0608C2	194	171.246
0608C3	194	173.21
0608C4	194	174.715
0608C5	194	173.613
0608C6	194	172.048
0609A2	248	18
0609A3	242	27
0609A4	253	18
0609A6	253	34
0609B1	49.3	74
0609B2	51.3	72
0609B3	54.3	66
0609B4	55.3	71
0609B5	54.3	74
0609B6	54.3	79
0609C1	198	170
0609C2	198	171.909
0609C3	199.269	171.909
0609C4	199.269	170.225
0609C5	201.119	170.225
0609C6	201.119	171.641
0610A1	268	24
0610A2	265	20
0610A3	265	8
0610A4	270	16
0610A5	276	18
0610A6	276	13
0610B1	50.3	94
0610B2	45.3	94
0610B3	37.3	90
0610B4	45.3	100
0610B5	37.3	98
0610B6	35.3	98
0610C1	202	170
0610C2	202	168.22
0610C3	202	169.417
0610C4	203.308	169.417
0610C5	203.308	170.834
0610C6	204.531	170.834
0706A2	291	18
0706A4	304	18
0706A5	298	12
0706A6	293	9
0706B2	25.3	90
0706B3	21.3	90
0706B4	23.3	95
0706C1	216	170
0706C2	217.808	170
0706C3	217.808	168.98
0706C4	217.808	170.313
0706C5	218.88	170.313
0706C6	218.88	171.724
0708A1	304	29
0708A2	316	38
0708A3	301	38
0708A4	301	49
0708A5	284	49
0708A6	284	42
0708B1	23.3	103
0708B2	19.3	108
0708B3	22.3	112
0708B4	23.3	118
0708B5	27.3	118
0708B6	29.3	115
0708C1	220	170
0708C2	221.342	170
0708C3	221.342	168.638
0708C4	223.316	168.638
0708C5	223.316	166.914
0708C6	223.316	165.782
0710A1	262	32
0710A2	268	32
0710A3	267	41
0710A4	258	37
0710A5	259	48
0710A6	262	56
0710B1	29.3	112
0710B2	30.3	115
0710B3	26.3	115
0710B4	20.3	115
0710B5	25.3	122
0710B6	28.3	121
0710C1	224	170
0710C2	224	168.768
0710C3	224	167.275
0710C4	224	165.313
0710C5	224	163.903
0710C6	224	162.523

## Sheet: spider trait
	Local.activity.density	Size	Shading.Niche.position	Adult.activity.period		Hunting.strategy		Generation.time		Biogeographic.range	Moisture.Niche.width	Moisture.Niche.position	Shading.Niche.width	ballooning.ability		Diet	Family	Family number	Genus	Size2	Abundance
Agyneta rurestris	0.00347044	1.06471	0.25	3	Eury	6	Space-web weavers	2	Type2	46	0.208	0.38	0.179	4	Very common	1.48	Linyphiidae	14	Agyneta	2.9	27
Amaurobius fenestralis	0.000128535	2.11626	0.71	2	Diplo	1	Sheet web	1	Type1	33	0.087	0.37	0.091	1	Uncommon	1.67	Amaurobiidae	3	Amaurobius	8.3	1
Anelosimus vittatus	0.000385604	1.51513	0.28	1	Steno	6	Space-web weavers	2	Type2	32	0.407	0.47	0.13	4	Very common	1.9	Theridiidae	15	Anelosimus	4.55	3
Anyphaena accentuata	0.359897	1.94591	0.62	2	Diplo	4	Foliage runner	2	Type2	43	0.155	0.35	0.14	4	Very common	1.79	Anyphaenidae	9	Anyphaena	7	2800
Araeoncus humilis	0.000514139	0.530628	0.14	3	Eury	6	Space-web weavers	1	Type1	38	0.168	0.31	0.13	4	Very common	0	Linyphiidae	14	Araeoncus	1.7	4
Araneus diadematus	0.00102828	2.78809	0.38	1	Steno	5	Orb-web weavers	3	Type3	52	0.296	0.51	0.147	4	Very common	1.42	Araneidae	11	Araneus	16.25	8
Araneus sturmi	0.0329049	1.65823	0.77	1	Steno	5	Orb-web weavers	2	Type2	42	0	0.36	0	3	Common	1.59	Araneidae	11	Araneus	5.25	256
Araneus triguttatus	0.000642674	1.79176	0.46	1	Steno	5	Orb-web weavers	2	Type2	32	0.128	0.3925	0.127	4	Very common	1.59	Araneidae	11	Araneus	6	5
Araniella cucurbitina	0.000642674	2.07944	0.44	2	Diplo	5	Orb-web weavers	2	Type2	48	0.109	0.4	0.095	4	Very common	1.36	Araneidae	11	Araniella	8	5
Araniella opisthographa	0.000257069	1.79176	0.54	2	Diplo	5	Orb-web weavers	2	Type2	34	0.003	0.34	0.109	4	Very common	1.5	Araneidae	11	Araniella	6	2
Ballus chalybeius	0.029563	1.16315	0.64	1	Steno	3	Ambushers and Stalkers	2	Type2	39	0.164	0.49	0.162	1	Uncommon	1.08	Salticidae	6	Ballus	3.2	230
Bathyphantes gracilis	0.000642674	0.788457	0.31	3	Eury	6	Space-web weavers	1	Type1	47	0.137	0.28	0.231	4	Very common	0.86	Linyphiidae	14	Bathyphantes	2.2	5
Centromerus sylvaticus	0.000257069	1.55814	0.45	1	Steno	6	Space-web weavers	2	Type2	38	0.182	0.36	0.236	4	Very common	0.82	Linyphiidae	14	Centromerus	4.75	2
Clubiona caerulescens	0.000257069	2.19722	0.66	2	Diplo	4	Foliage runner	2	Type2	35	0.098	0.41	0.102	3	Common	1.3	Clubionidae	8	Clubiona	9	2
Clubiona comta	0.00269923	1.70475	0.58	2	Diplo	4	Foliage runner	2	Type2	41	0.114	0.32	0.187	3	Common	1.3	Clubionidae	8	Clubiona	5.5	21
Clubiona terrestris	0.000514139	1.94591	0.65	3	Eury	4	Foliage runner	2	Type2	37	0.111	0.38	0.152	3	Common	1.3	Clubionidae	8	Clubiona	7	4
Coelotes terrestris	0.000128535	2.44235	0.61	2	Diplo	1	Sheet web	2	Type2	20	0.156	0.4	0.207	1	Uncommon	1.23	Agelenidae	4	Coelotes	11.5	1
Collinsia inerrans	0.000128535	0.81093	0.22	1	Steno	6	Space-web weavers	2	Type2	16	0	0.3	0	4	Very common	0.82	Linyphiidae	14	Collinsia	2.25	1
Cyclosa conica	0.0492288	1.94591	0.54	1	Steno	5	Orb-web weavers	2	Type2	47	0.356	0.64	0.313	3	Common	1.29	Araneidae	11	Cyclosa	7	383
Diaea dorsata	0.0543702	1.81645	0.51	1	Steno	3	Ambushers and Stalkers	2	Type2	40	0.199	0.57	0.171	4	Very common	1.39	Thomisidae	5	Diaea	6.15	423
Dicymbium nigrum	0.000128535	1.16315	0.3	2	Diplo	6	Space-web weavers	1	Type1	38	0.15	0.31	0.189	4	Very common	1.27	Linyphiidae	14	Dicymbium	3.2	1
Diplocephalus picinus	0.000385604	0.693147	0.52	2	Diplo	6	Space-web weavers	3	Type3	36	0.116	0.3	0.226	3	Common	0.82	Linyphiidae	14	Dicymbium	2	3
Dipoena melanogaster	0.000257069	1.11514	0.26	1	Steno	6	Space-web weavers	2	Type2	34	0	0.83	0	3	Common	0	Theridiidae	15	Dipoena	3.05	2
Drapetisca socialis	0.00655527	1.47018	0.66	1	Steno	6	Space-web weavers	2	Type2	37	0.091	0.33	0.103	2	Less common	1.82	Linyphiidae	14	Drapetisca	4.35	51
Enoplognatha ovata	0.0151671	1.88707	0.46	1	Steno	6	Space-web weavers	1	Type1	48	0.186	0.38	0.192	4	Very common	0.64	Theridiidae	15	Enoplognatha	6.6	118
Entelecara acuminata	0.00372751	0.788457	0.37	1	Steno	6	Space-web weavers	2	Type2	34	0.237	0.4	0.076	3	Common	0.81	Linyphiidae	14	Entelecara	2.2	29
Entelecara erythropus	0.000257069	1.04732	0.5	1	Steno	6	Space-web weavers	1	Type1	29	0	0.21	0	4	Very common	0.81	Linyphiidae	14	Entelecara	2.85	2
Erigone atra	0.00411311	0.832909	0.29	3	Eury	6	Space-web weavers	1	Type1	42	0.161	0.29	0.22	4	Very common	1.12	Linyphiidae	14	Erigone	2.3	32
Erigone dentipalpis	0.00115681	0.832909	0.23	3	Eury	6	Space-web weavers	1	Type1	48	0.183	0.31	0.175	4	Very common	1.38	Linyphiidae	14	Erigone	2.3	9
Erigonella hiemalis	0.000514139	1.0116	0.39	3	Eury	6	Space-web weavers	1	Type1	29	0.165	0.37	0.197	2	Less common	1.25	Linyphiidae	14	Erigonella	2.75	4
Evarcha falcata	0.000128535	1.84845	0.48	1	Steno	3	Ambushers and Stalkers	1	Type1	45	0.173	0.58	0.136	2	Less common	1.4	Salticidae	6	Evarcha	6.35	1
Gibbaranea bituberculata	0.00218509	2.02155	0.62	1	Steno	5	Orb-web weavers	2	Type2	39	0.169	0.47	0.261	2	Less common	1.61	Araneidae	11	Gibbaranea	7.55	17
Gibbaranea gibbosa	0.000385604	2.0149	0.685	1	Steno	5	Orb-web weavers	2	Type2	36	0.093	0.405	0.143	2	Less common	1.61	Araneidae	11	Gibbaranea	7.5	3
Heliophanus cupreus	0.000257069	1.64866	0.36	2	Diplo	3	Ambushers and Stalkers	2	Type2	46	0.191	0.7	0.11	3	Common	1.25	Salticidae	6	Heliophanus	5.2	2
Hyptiotes paradoxus	0.0132391	1.70475	0.63	1	Steno	5	Orb-web weavers	3	Type3	37	0	0.4	0	1	Uncommon	0.96	Uloboridae	12	Hyptiotes	5.5	103
Labulla thoracica	0.000128535	1.83258	0.76	3	Eury	6	Space-web weavers	1	Type1	25	0.001	0.36	0.01	2	Less common	1.78	Linyphiidae	14	Labulla	6.25	1
Lathys humilis	0.000128535	1.18632	0.69	1	Steno	6	Space-web weavers	2	Type2	35	0.032	0.31	0.04	4	Very common	0.84	Dictynidae	10	Lathys	3.275	1
Lepthyphantes minutus	0.000514139	1.84055	0.74	3	Eury	6	Space-web weavers	2	Type2	31	0.052	0.3	0.096	4	Very common	0.82	Linyphiidae	14	Lepthyphantes	6.3	4
Linyphia hortensis	0.000385604	1.61939	0.62	1	Steno	6	Space-web weavers	2	Type2	35	0.09	0.36	0.138	3	Common	1.78	Linyphiidae	14	Linyphia	5.05	3
Linyphia triangularis	0.00359897	1.79176	0.53	1	Steno	6	Space-web weavers	2	Type2	46	0.17	0.4	0.171	4	Very common	1.74	Linyphiidae	14	Linyphia	6	28
Mangora acalypha	0.0718509	1.7492	0.3	1	Steno	5	Orb-web weavers	2	Type2	57	0.306	0.62	0.094	4	Very common	1.12	Araneidae	11	Mangora	5.75	559
Maso sundevalli	0.000642674	0.97456	0.49	3	Eury	6	Space-web weavers	2	Type2	41	0.131	0.37	0.197	2	Less common	1.25	Linyphiidae	14	Maso	2.65	5
Mermessus trilobatus	0.0029563	0.615186	0.3022	3	Eury	6	Space-web weavers	1	Type1	10	0.119	0.32	0.1295	4	Very common	1.25	Linyphiidae	14	Mermessus	1.85	23
Metellina mengei	0.118895	1.65823	0.63	1	Steno	5	Orb-web weavers	2	Type2	41	0.058	0.26	0.15	3	Common	1.48	Tetragnathidae	13	Metellina	5.25	925
Metellina segmentata	0.00385604	2.04769	0.58	2	Diplo	5	Orb-web weavers	1	Type1	50	0.199	0.39	0.169	4	Very common	1.17	Tetragnathidae	13	Metellina	7.75	30
Micrommata virescens	0.000385604	2.66026	0.26	1	Steno	4	Foliage runner	2	Type2	47	0.098	0.8	0.092	1	Uncommon	1.4	Segestriidae	16	Micrommata	14.3	3
Microneta viaria	0.000128535	1.17865	0.58	3	Eury	6	Space-web weavers	1	Type1	43	0.132	0.36	0.217	3	Common	0.92	Linyphiidae	14	Microneta	3.25	1
Moebelia penicillata	0.000514139	0.97456	0.71	2	Diplo	6	Space-web weavers	2	Type2	37	0.009	0.3	0.069	4	Very common	0.82	Linyphiidae	14	Moebelia	2.65	4
Neottiura bimaculata	0.000257069	0.955511	0.26	2	Diplo	6	Space-web weavers	2	Type2	46	0.141	0.72	0.051	4	Very common	1.39	Theridiidae	15	Neottiura	2.6	2
Neriene emphana	0.00244216	1.65823	0.75	1	Steno	6	Space-web weavers	2	Type2	34	0.038	0.34	0.083	3	Common	0.92	Linyphiidae	14	Neriene	5.25	19
Neriene peltata	0.0708226	1.65823	0.66	2	Diplo	6	Space-web weavers	2	Type2	38	0.056	0.31	0.128	3	Common	0.92	Linyphiidae	14	Neriene	5.25	551
Nigma flavescens	0.00359897	1.29473	0.55	1	Steno	6	Space-web weavers	2	Type2	26	0	0.24	0	2	Less common	0.47	Dictynidae	10	Nigma	3.65	28
Nusoncus nasutus	0.00719794	0.667829	0.69	2	Diplo	6	Space-web weavers	1	Type1	15	0.077	0.31	0.137	3	Common	0.63	Linyphiidae	14	Nusoncus	1.95	56
Obscuriphantes obscurus	0.000385604	1.29473	0.465	1	Steno	6	Space-web weavers	2	Type2	33	0.115	0.38	0.1415	2	Less common	0.82	Linyphiidae	14	Obscuriphantes	3.65	3
Oedothorax apicatus	0.000514139	1.09861	0.19	2	Diplo	6	Space-web weavers	1	Type1	40	0.139	0.28	0.157	4	Very common	0.94	Linyphiidae	14	Oedothorax	3	4
Oedothorax retusus	0.000128535	1.04732	0.25	2	Diplo	6	Space-web weavers	2	Type2	39	0.141	0.18	0.188	4	Very common	0.94	Linyphiidae	14	Oedothorax	2.85	1
Pachygnatha degeeri	0.000385604	1.34807	0.27	1	Steno	5	Orb-web weavers	1	Type1	47	0.195	0.38	0.197	4	Very common	1.56	Tetragnathidae	13	Pachygnatha	3.85	3
Paidiscura pallens	0.0412596	0.615186	0.4086	3	Eury	6	Space-web weavers	1	Type1	34	0.1877	0.52	0.5433	4	Very common	1.31	Theridiidae	15	Paidiscura	1.85	321
Parasteatoda lunata	0.000385604	1.639	0.43	1	Steno	6	Space-web weavers	2	Type2	41	0	0.34	0	3	Common	1.1	Theridiidae	15	Parasteatoda	5.15	3
Parasteatoda simulans	0.00192802	1.64866	0.305	1	Steno	6	Space-web weavers	2	Type2	29	0.028	0.315	0.074	3	Common	1.1	Theridiidae	15	Parasteatoda	5.2	15
Pardosa lugubris	0.000128535	1.8563	0.49	2	Diplo	2	Ground	2	Type2	43	0.188	0.95	0.204	4	Very common	2.03	Lycosidae	1	Pardosa	6.4	1
Pardosa saltans	0.000514139	1.83258	0.3275	2	Diplo	2	Ground	1	Type1	15	0.2036	0.5517	0.1604	3	Common	1.69	Lycosidae	1	Pardosa	6.25	4
Philodromus albidus	0.000385604	1.78171	0.5544	1	Steno	3	Ambushers and Stalkers	2	Type2	17	0.0973	0.4378	0.1106	3	Common	1.18	Philodromidae	7	Philodromus	5.94	3
Philodromus aureolus	0.000771208	1.83098	0.43	1	Steno	3	Ambushers and Stalkers	2	Type2	49	0.164	0.57	0.163	4	Very common	1.18	Philodromidae	7	Philodromus	6.24	6
Philodromus collinus	0.000385604	1.70475	0.62	1	Steno	3	Ambushers and Stalkers	2	Type2	37	0.192	0.47	0.212	4	Very common	1.18	Philodromidae	7	Philodromus	5.5	3
Pisaura mirabilis	0.000128535	2.60269	0.29	1	Steno	3	Ambushers and Stalkers	2	Type2	56	0.193	0.44	0.173	4	Very common	1.89	Pisauridae	2	Pisaura	13.5	1
Platnickina tincta	0.025964	1.20896	0.5	3	Eury	6	Space-web weavers	1	Type1	44	0.27	0.57	0.197	4	Very common	1.02	Theridiidae	15	Platnickina	3.35	202
Porrhomma microphthalmum	0.00269923	0.615186	0.24	2	Diplo	6	Space-web weavers	1	Type1	30	0.13	0.29	0.245	4	Very common	1.6	Linyphiidae	14	Porrhomma	1.85	21
Porrhomma oblitum	0.000257069	0.993252	0.23	1	Steno	6	Space-web weavers	1	Type1	20	0.08	0.22	0.23	4	Very common	1.6	Linyphiidae	14	Porrhomma	2.7	2
Porrhomma pygmaeum	0.000128535	0.916291	0.32	2	Diplo	6	Space-web weavers	1	Type1	41	0.135	0.19	0.237	4	Very common	1.6	Linyphiidae	14	Porrhomma	2.5	1
Robertus arundineti	0.000128535	0.864997	0.21	3	Eury	6	Space-web weavers	1	Type1	39	0.119	0.3	0.172	4	Very common	0	Theridiidae	15	Robertus	2.375	1
Saaristoa firma	0.000128535	1.0116	0.78	3	Eury	6	Space-web weavers	1	Type1	19	0	0.28	0	1	Uncommon	0.41	Linyphiidae	14	Saaristoa	2.75	1
Sintula corniger	0.000128535	1.09861	0.5	2	Diplo	6	Space-web weavers	1	Type1	24	0.103	0.48	0.112	1	Uncommon	1.14	Linyphiidae	14	Sintula	3	1
Synema globosum	0.000128535	2.00148	0.42	2	Diplo	3	Ambushers and Stalkers	1	Type1	40	0.199	0.71	0.171	4	Very common	1.5	Thomisidae	5	Synema	7.4	1
Tenuiphantes alacris	0.000128535	1.37372	0.71	2	Diplo	6	Space-web weavers	1	Type1	33	0.081	0.34	0.124	3	Common	0.17	Linyphiidae	14	Tenuiphantes	3.95	1
Tenuiphantes flavipes	0.000899743	1.1474	0.59	3	Eury	6	Space-web weavers	1	Type1	36	0.147	0.75	0.184	4	Very common	0.17	Linyphiidae	14	Tenuiphantes	3.15	7
Tenuiphantes tenebricola	0.000642674	1.23837	0.66	3	Eury	6	Space-web weavers	2	Type2	39	0.083	0.33	0.178	4	Very common	0.17	Linyphiidae	14	Tenuiphantes	3.45	5
Tenuiphantes tenuis	0.000771208	1.1474	0.31	3	Eury	6	Space-web weavers	1	Type1	45	0.175	0.31	0.202	4	Very common	0.17	Linyphiidae	14	Tenuiphantes	3.15	6
Tetragnatha montana	0.000514139	2.3979	0.35	2	Diplo	5	Orb-web weavers	2	Type2	45	0.301	0.43	0.166	4	Very common	0.98	Tetragnathidae	13	Tetragnatha	11	4
Tetragnatha obtusa	0.00154242	1.80829	0.31	1	Steno	5	Orb-web weavers	2	Type2	43	0.254	0.47	0.089	4	Very common	0.91	Tetragnathidae	13	Tetragnatha	6.1	12
Tetragnatha pinicola	0.0398458	1.70475	0.43	1	Steno	5	Orb-web weavers	2	Type2	36	0.206	0.44	0.18	4	Very common	0.91	Tetragnathidae	13	Tetragnatha	5.5	310
Theridion mystaceum	0.0101542	0.916291	0.73	2	Diplo	6	Space-web weavers	1	Type1	37	0	0.27	0	4	Very common	1.12	Theridiidae	15	Theridion	2.5	79
Theridion pinastri	0.00231363	1.25276	0.4086	1	Steno	6	Space-web weavers	2	Type2	38	0.1877	0.52	0.5433	3	Common	1.05	Theridiidae	15	Theridion	3.5	18
Theridion varians	0.0033419	1.44692	0.31	1	Steno	6	Space-web weavers	2	Type2	45	0.24	0.44	0.144	3	Common	0.69	Theridiidae	15	Theridion	4.25	26
Thyreosthenius parasiticus	0.000385604	0.559616	0.44	3	Eury	6	Space-web weavers	1	Type1	33	0.05	0.32	0.194	3	Common	1.09	Linyphiidae	14	Thyreosthenius	1.75	3
Xysticus cf. VS45	0.000128535	2.19722	0.314	2	Diplo	3	Ambushers and Stalkers	1	Type1	32	0.148	0.54	0.1158	3	Common	1.87	Thomisidae	5	Xysticus	9	1
Xysticus lanio	0.000514139	1.64866	0.54	1	Steno	3	Ambushers and Stalkers	2	Type2	41	0.251	0.51	0.169	3	Common	1.87	Thomisidae	5	Xysticus	5.2	4
Zilla diodia	0.000385604	1.45862	0.685	1	Steno	5	Orb-web weavers	2	Type2	38	0.093	0.405	0.143	2	Less common	0	Araneidae	11	Zilla	4.3	3
